# Supplementary material for: Cryptic population structure reveals low dispersal in Iberian wolves
Source: PubMed Central journal article supplement (PMC6147861; doi:10.1038/s41598-018-32369-3), 2018-09-20
Supplement: 41598_2018_32369_MOESM1_ESM.pdf [file 41598_2018_32369_MOESM1_ESM.pdf]

## Supporting Information for

### Cryptic population structure reveals low dispersal in the Iberian wolf

**Pedro Silva<sup>1,2</sup>, José Vicente López-Bao<sup>3</sup>, Luis Llaneza<sup>4</sup>, Francisco Álvares<sup>1</sup>, Susana Lopes<sup>1</sup>, Juan Carlos Blanco<sup>5</sup>, Yolanda Cortés<sup>5</sup>, Emilio García<sup>4</sup>, Vicente Palacios<sup>4</sup>, Helena Rio-Maior<sup>1,2</sup>, Nuno Ferrand<sup>1,2,6</sup>, Raquel Godinho<sup>1,2,6</sup>**

<sup>1</sup>CIBIO/InBio - Centro de Investigação em Biodiversidade e Recursos Genéticos, Universidade do Porto, Campus de Vairão, 4485-661 Vairão, Portugal

<sup>2</sup>Departamento de Biologia, Faculdade de Ciências, Universidade do Porto, 4169-007 Porto, Portugal

<sup>3</sup>Research Unit of Biodiversity (UO/CSIC/PA), University of Oviedo, 33600, Mieres, Spain

<sup>4</sup>A.RE.NA, Asesores en Recursos Naturales, S.L, 27003 Lugo, Spain

<sup>5</sup>Proyecto Lobo CBC, C/ Manuela Malasaña 24, 28004 Madrid, Spain

<sup>6</sup>Department of Zoology, Faculty of Sciences, University of Johannesburg, Auckland Park 2006, South Africa

#### Table of Contents

|                                                                                                                                                                           |    |
|---------------------------------------------------------------------------------------------------------------------------------------------------------------------------|----|
| Fig. S1: Mean posterior likelihoods and $\Delta K$ values of Structure runs                                                                                               | 2  |
| Fig. S2: Spatial projection of Structure results for K=2 to K=12                                                                                                          | 3  |
| Fig. S3: Spatial projection of the results from the hierarchical Structure analysis                                                                                       | 9  |
| Fig. S4: BIC values for each number of clusters in the DAPC analysis                                                                                                      | 10 |
| Fig. S5: Distribution of membership proportions and cut-off values for each cluster at K=4                                                                                | 11 |
| Fig. S6: Distribution of membership proportions and cut-off values for each cluster at K=11                                                                               | 12 |
| Fig. S7: Spatial overlap between the genetic groups identified at K=4 and main rivers, main roads (highways), and the Sites of Community Interest (Natura 2000 Network).  | 14 |
| Fig. S8: Spatial overlap between the genetic groups identified at K=11 and main rivers, main roads (highways), and the Sites of Community Interest (Natura 2000 Network). | 15 |
| Table S1: Microsatellite loci used in this study                                                                                                                          | 16 |
| Table S2: PCR conditions for microsatellite loci used in this study.                                                                                                      | 19 |
| Table S3: Summary of the spatial behavior information                                                                                                                     | 21 |
| Table S4: Genetic diversity and relatedness of genetic clusters and geographical genetic groups at K=4                                                                    | 24 |
| Table S5: Genetic diversity and relatedness of genetic clusters and geographical genetic groups at K=11                                                                   | 25 |
| Table S6: Pairwise $F_{ST}$ matrix between geographical populations and genetic clusters at K=4                                                                           | 27 |
| Table S7: Pairwise $F_{ST}$ matrix between geographical populations and genetic clusters at K=11                                                                          | 28 |
| Table S8: Pairwise Jost's D distance matrix between geographical populations and genetic clusters at K=4                                                                  | 29 |
| Table S9: Pairwise Jost's D distance matrix between geographical populations and genetic clusters at K=11                                                                 | 30 |

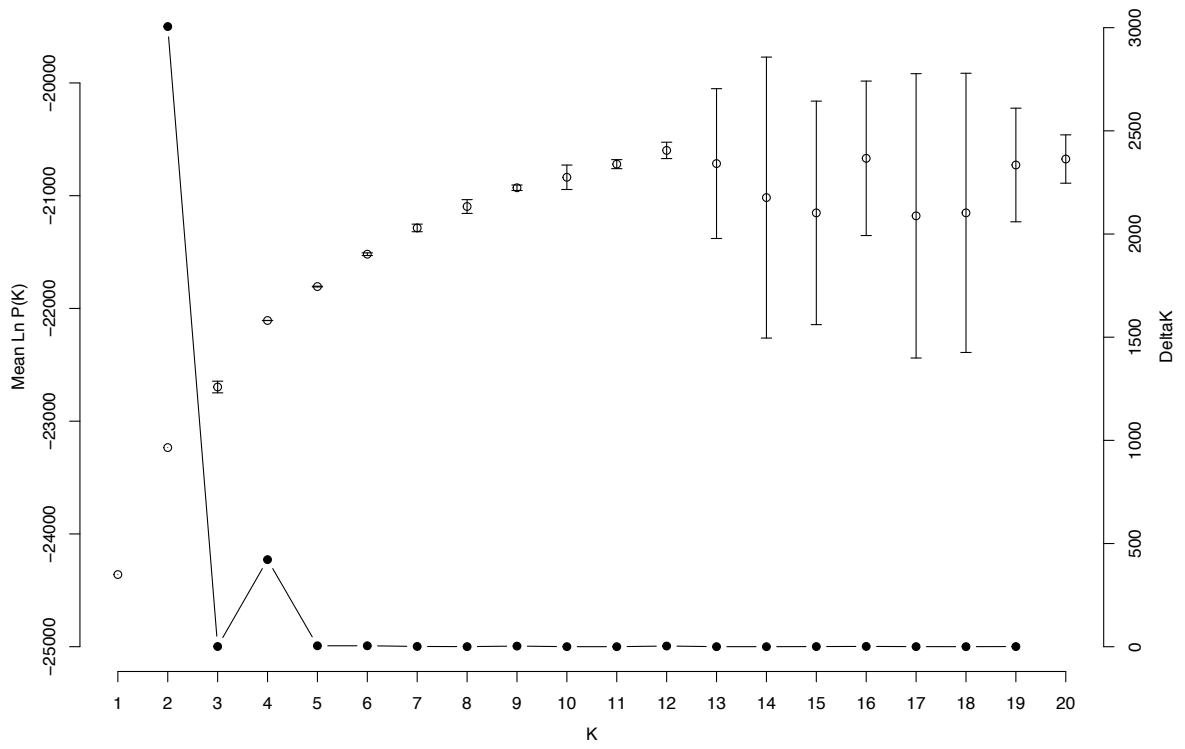

**Fig. S1:** Mean posterior likelihoods (open circles) and  $\Delta K$  values (full circles) of Structure runs for  $K=1$  to  $K=20$  across 20 independent runs for each  $K$ .

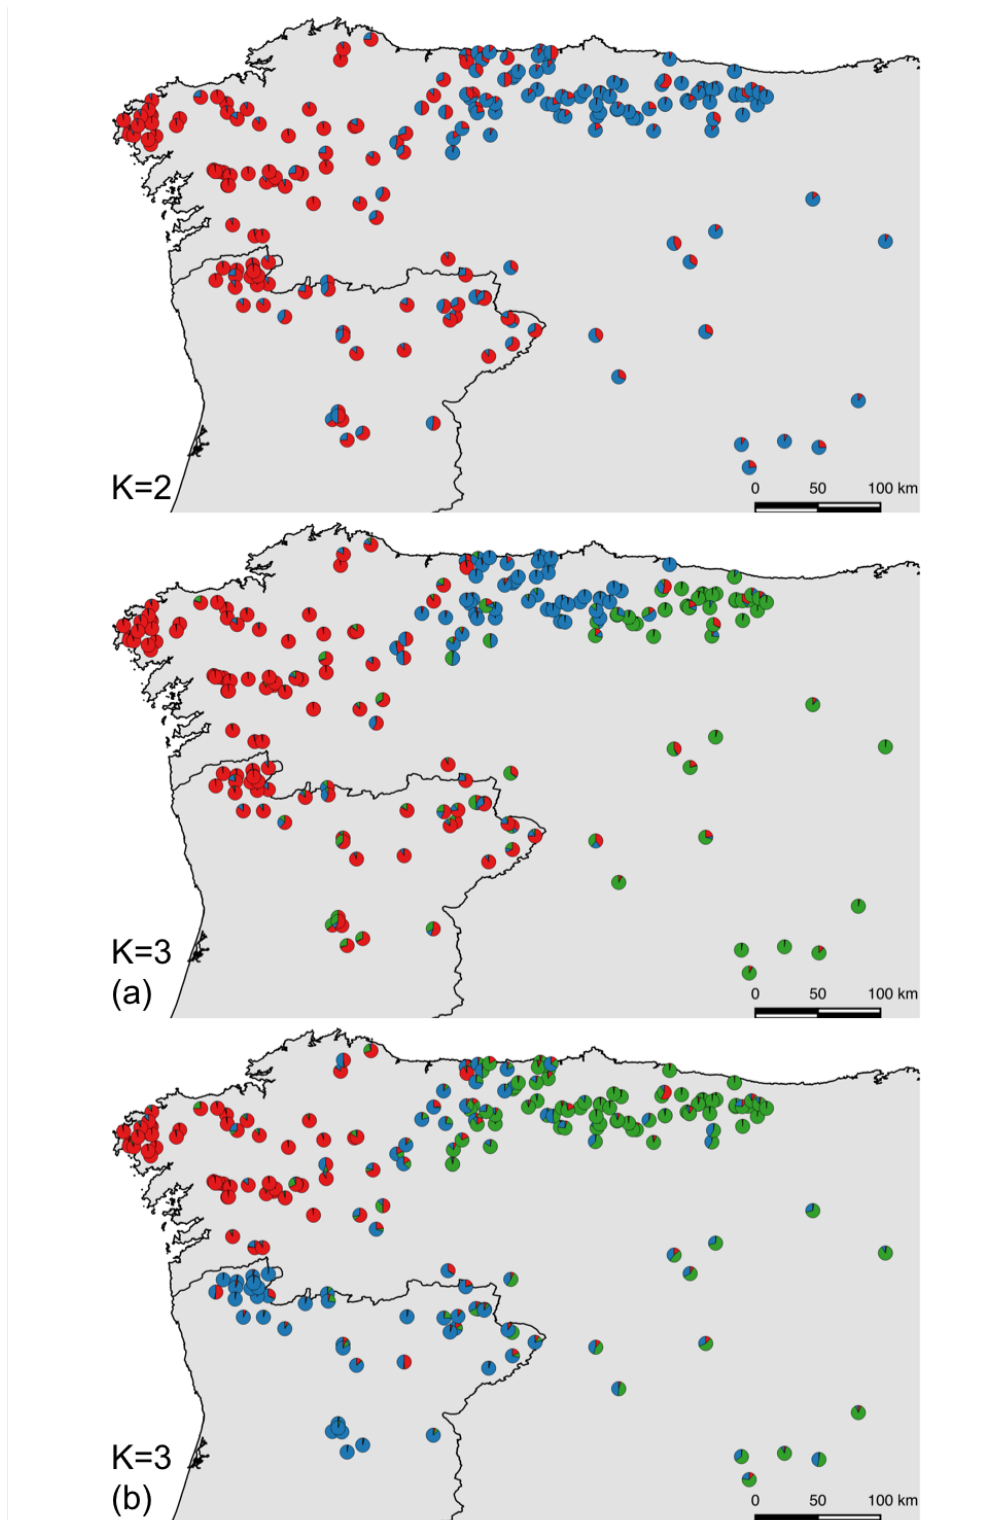

**Fig. S2: Spatial projection of Structure results for K=2 to K=12.** Each genetic cluster is represented as a different color. Individuals are represented at their sampling location as circles, with colors proportional to individual membership proportions to each cluster. Some K values presented more than one partition scheme with high posterior likelihood; in these cases, the alternatives are identified with (a), (b), ...

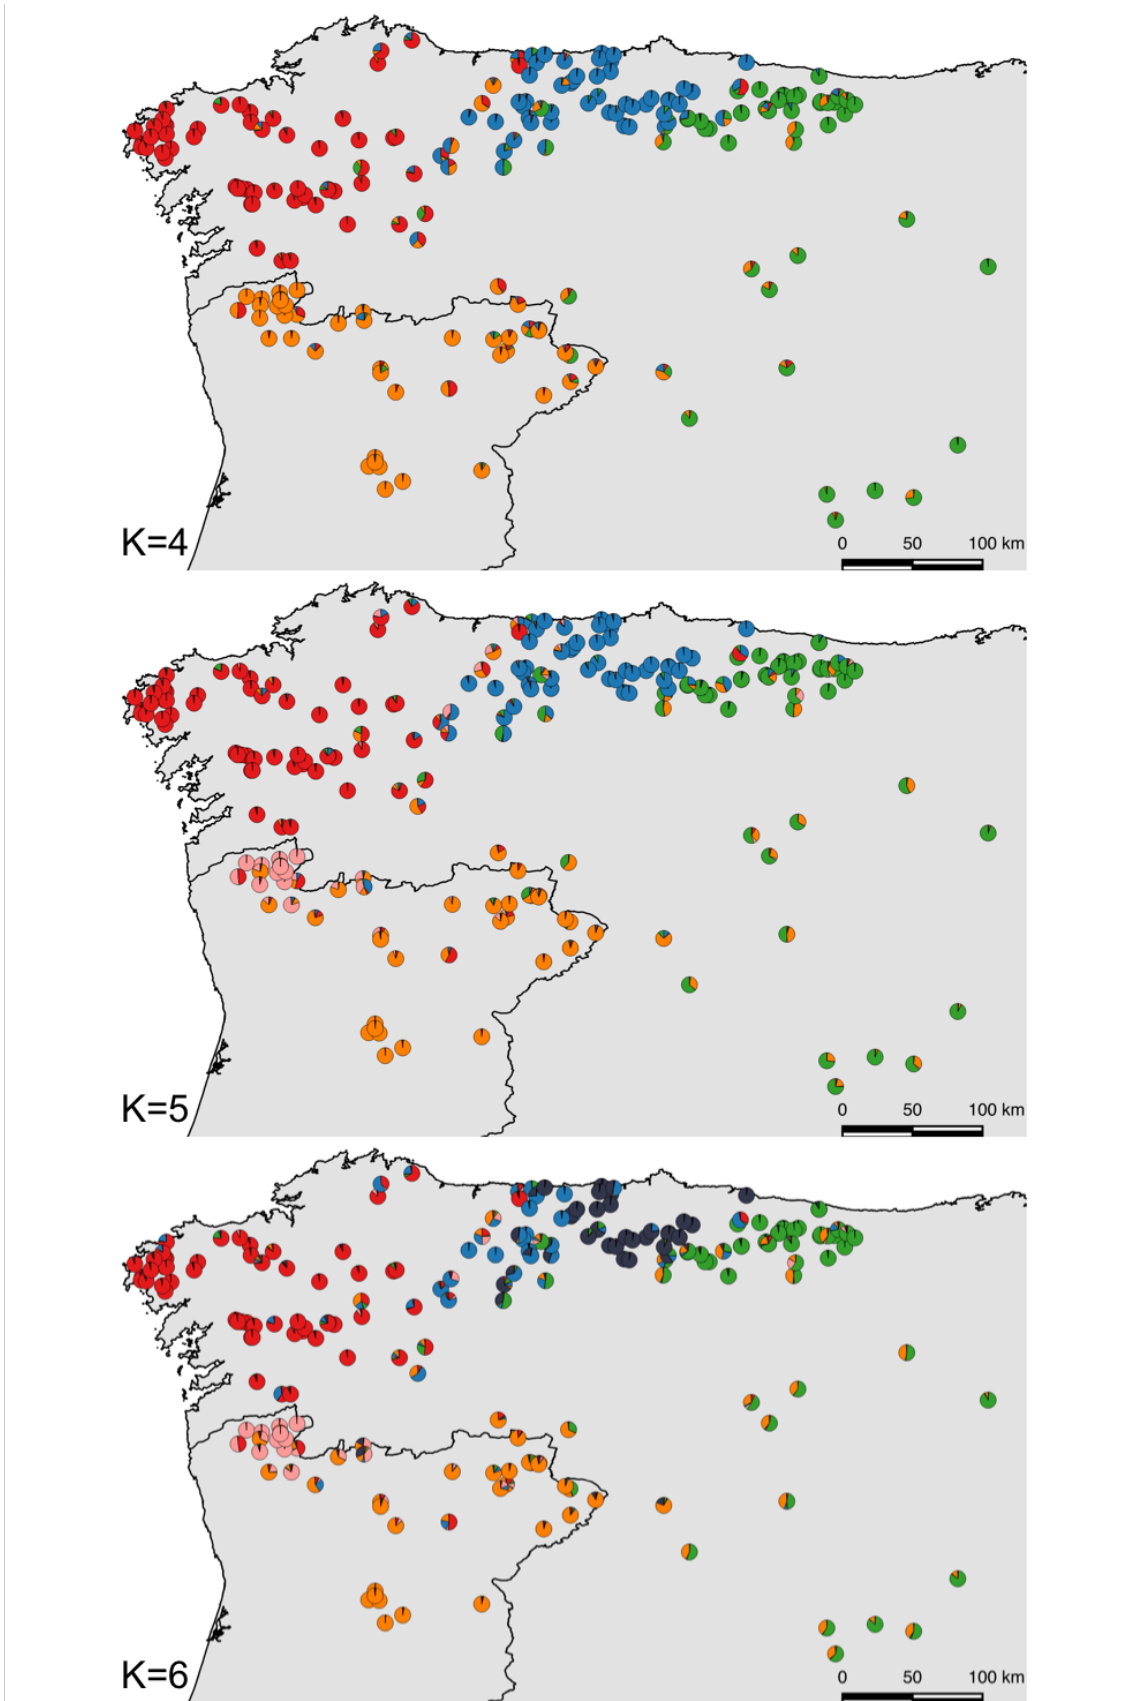

Fig. S2 (continued)

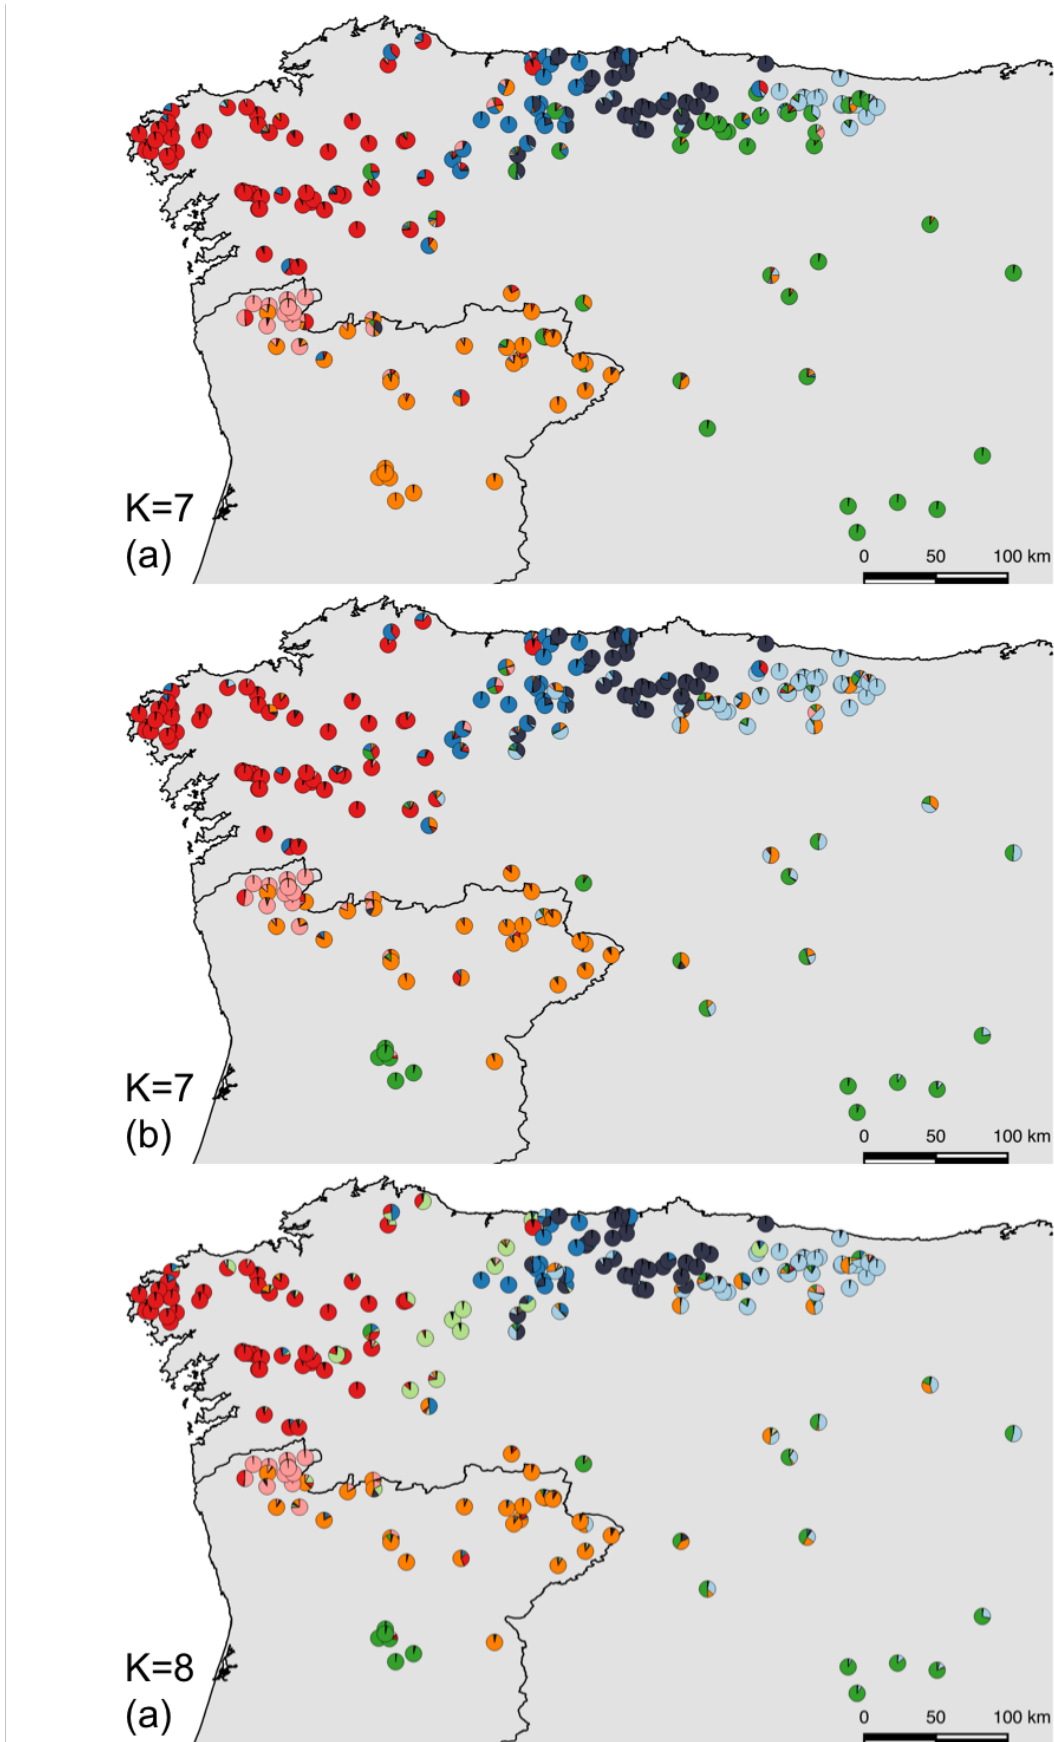

Fig. S2 (continued)

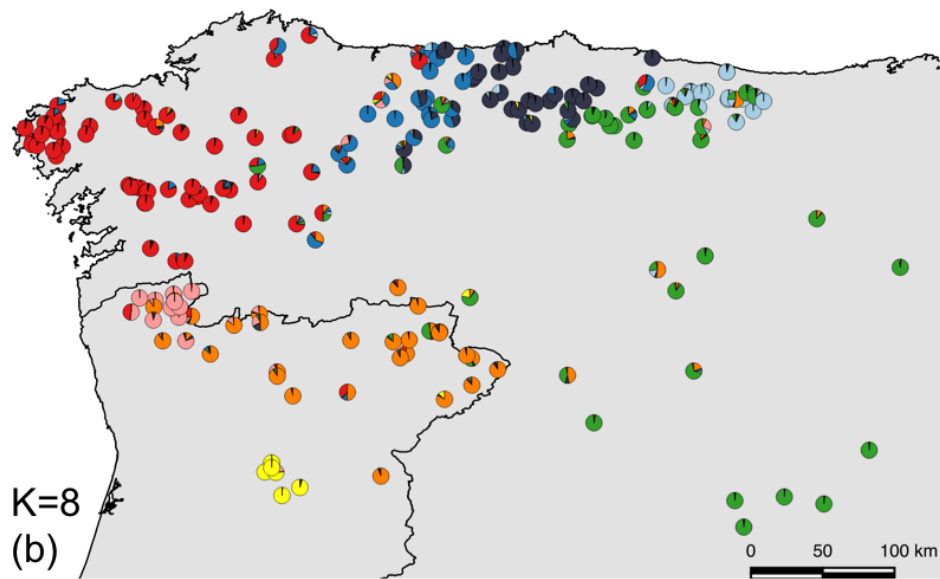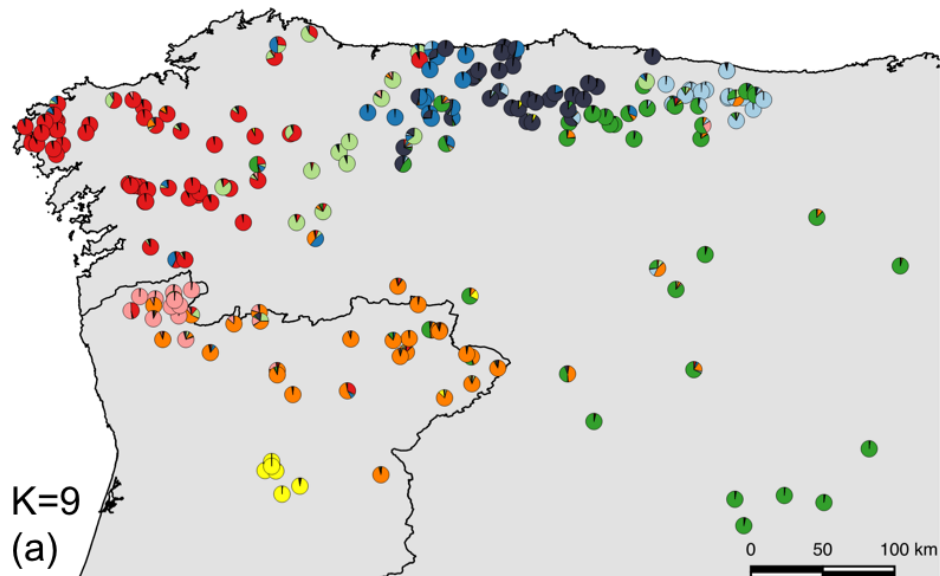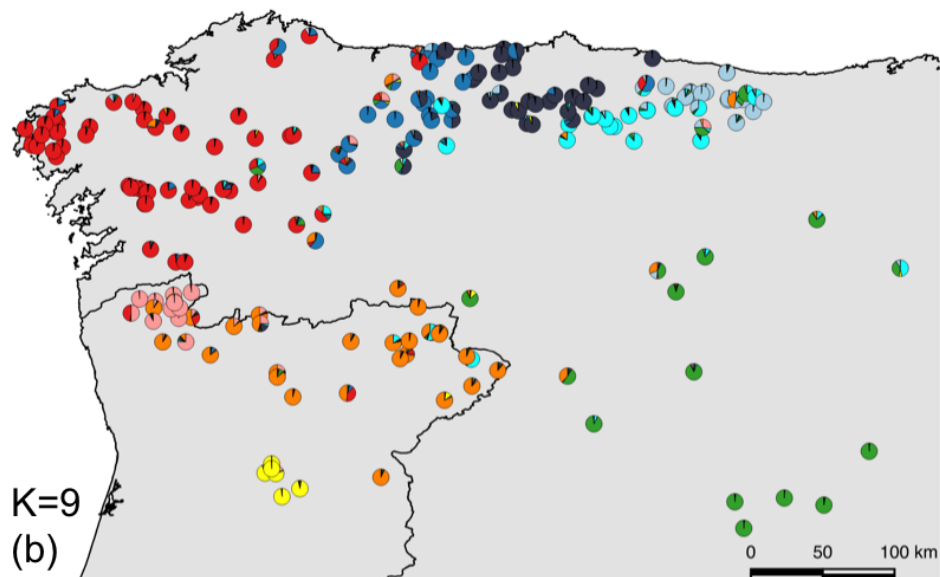

Fig. S2 (continued)

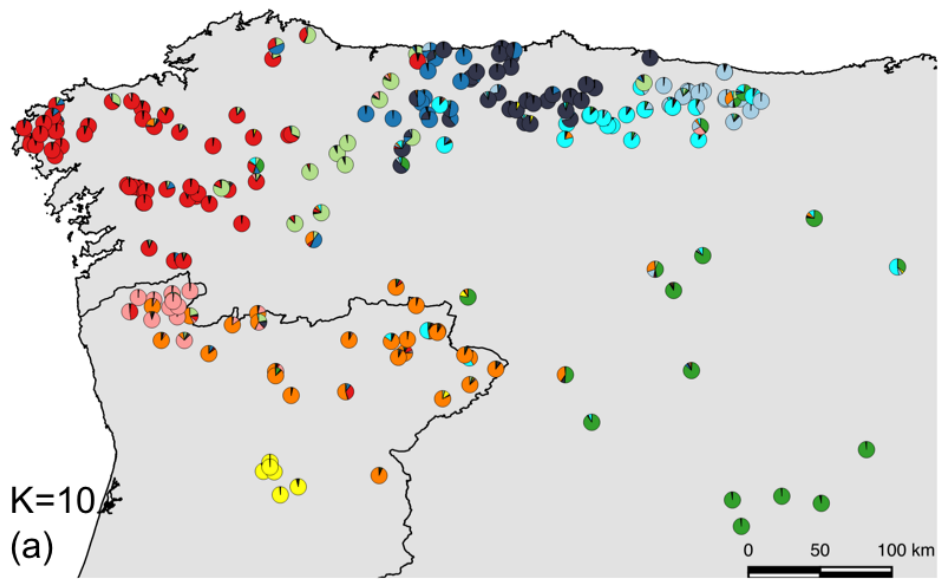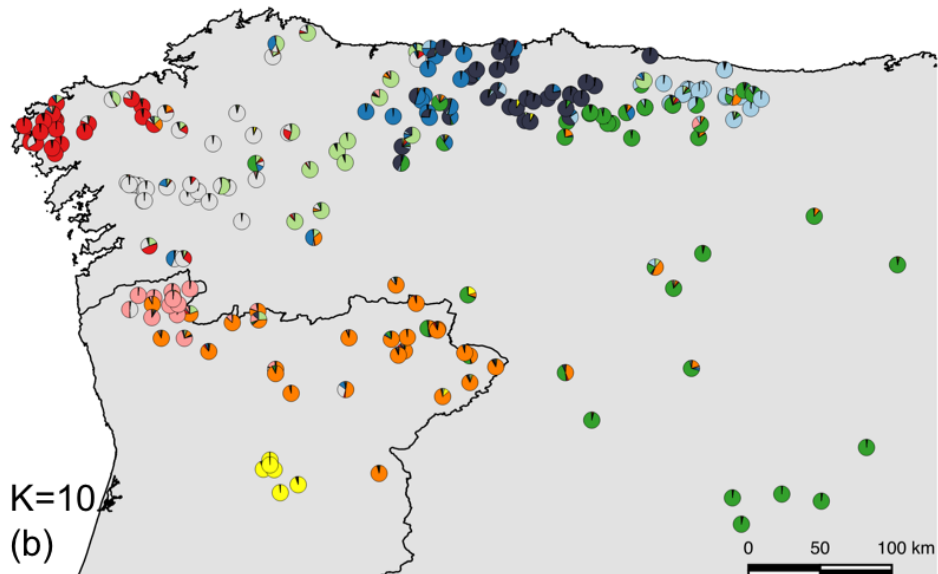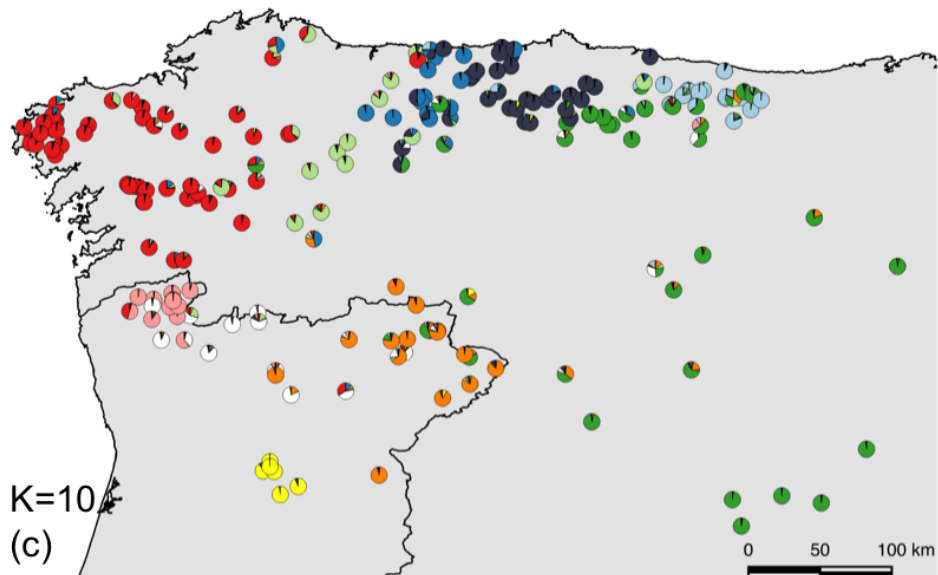

Fig. S2 (continued)

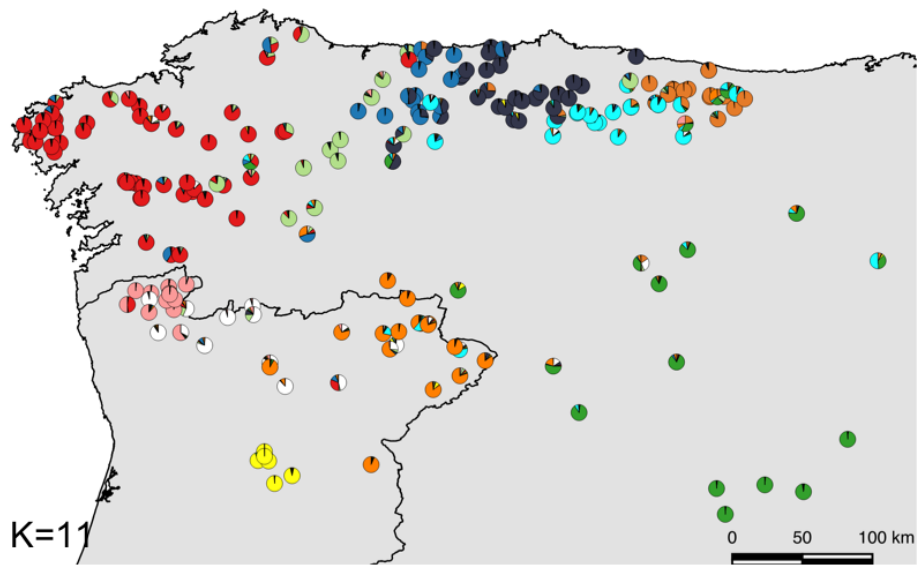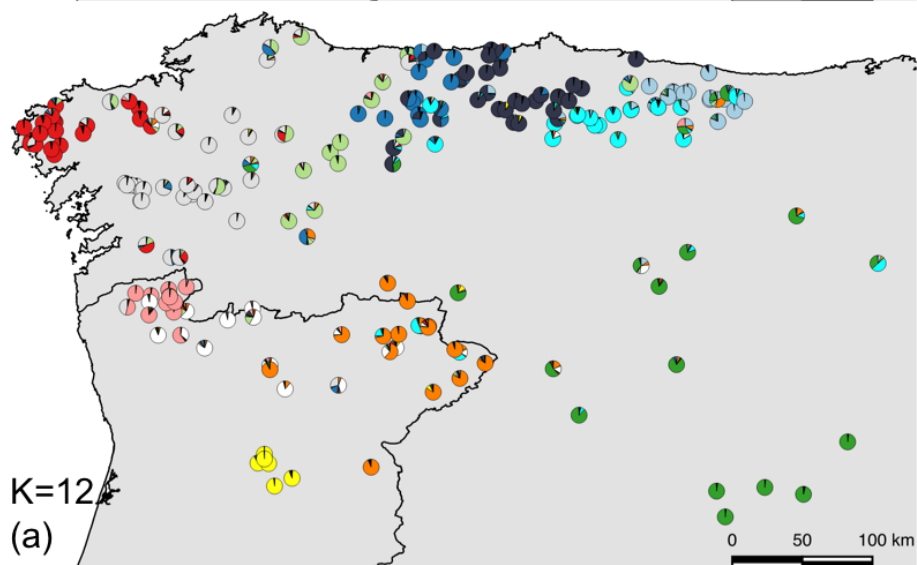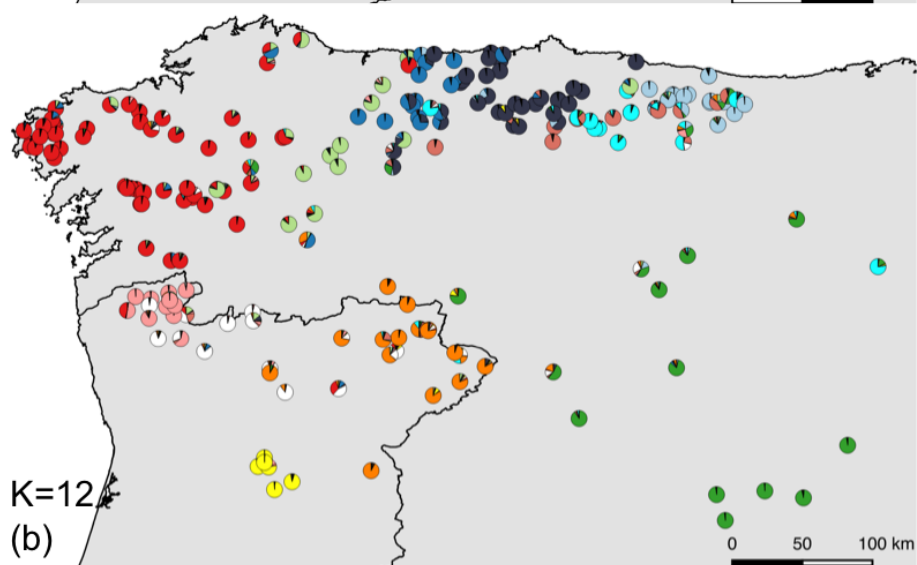

Fig. S2 (continued)



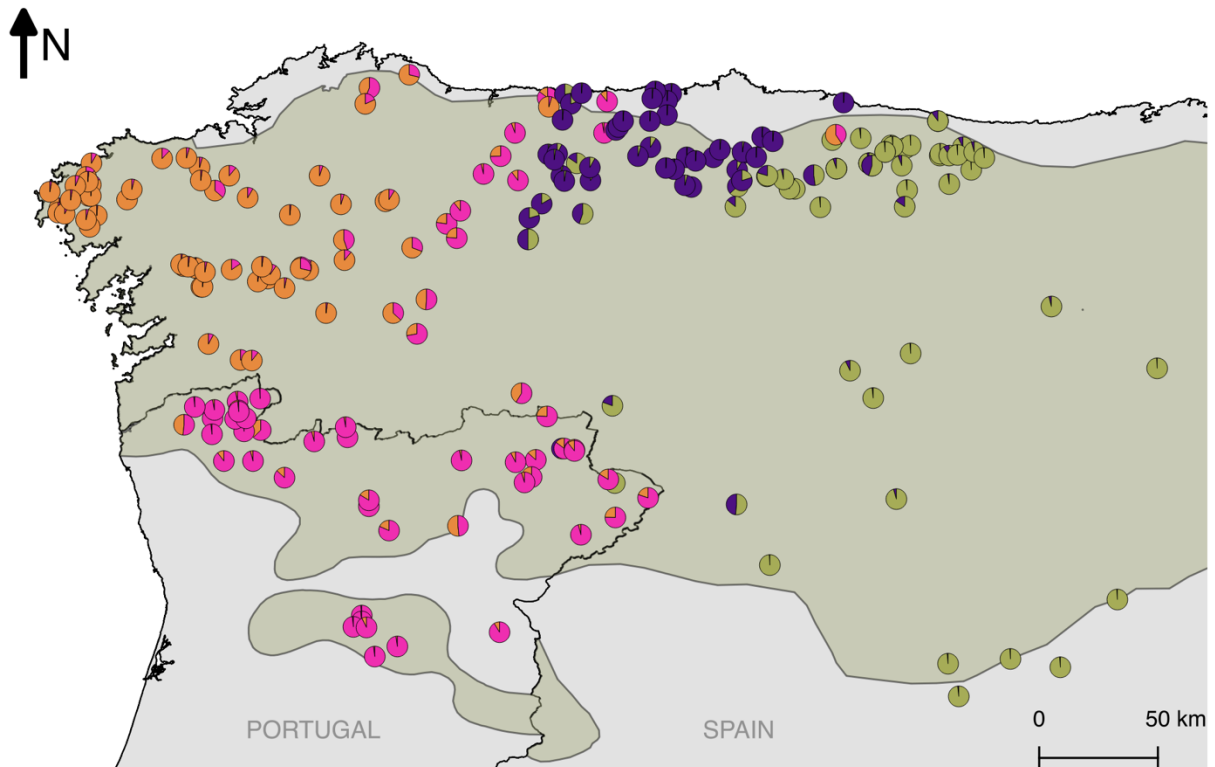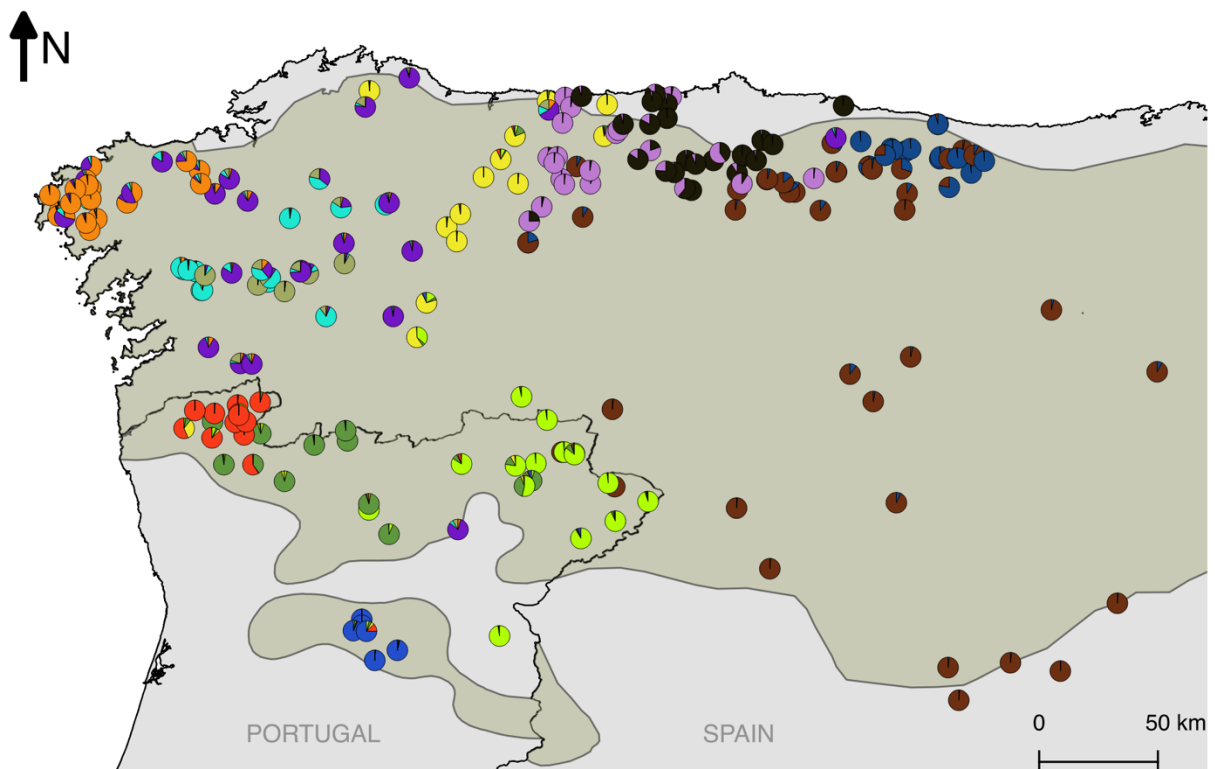

**Fig. S3: Spatial projection of the results from the hierarchical Structure analysis, for a total number of clusters of four (top) and 13 (bottom).** Structure was run independently for each cluster identified at  $K=2$ , and then again for each of the subsequent clusters. The grey shade represents the wolf distribution in the Iberian Peninsula.

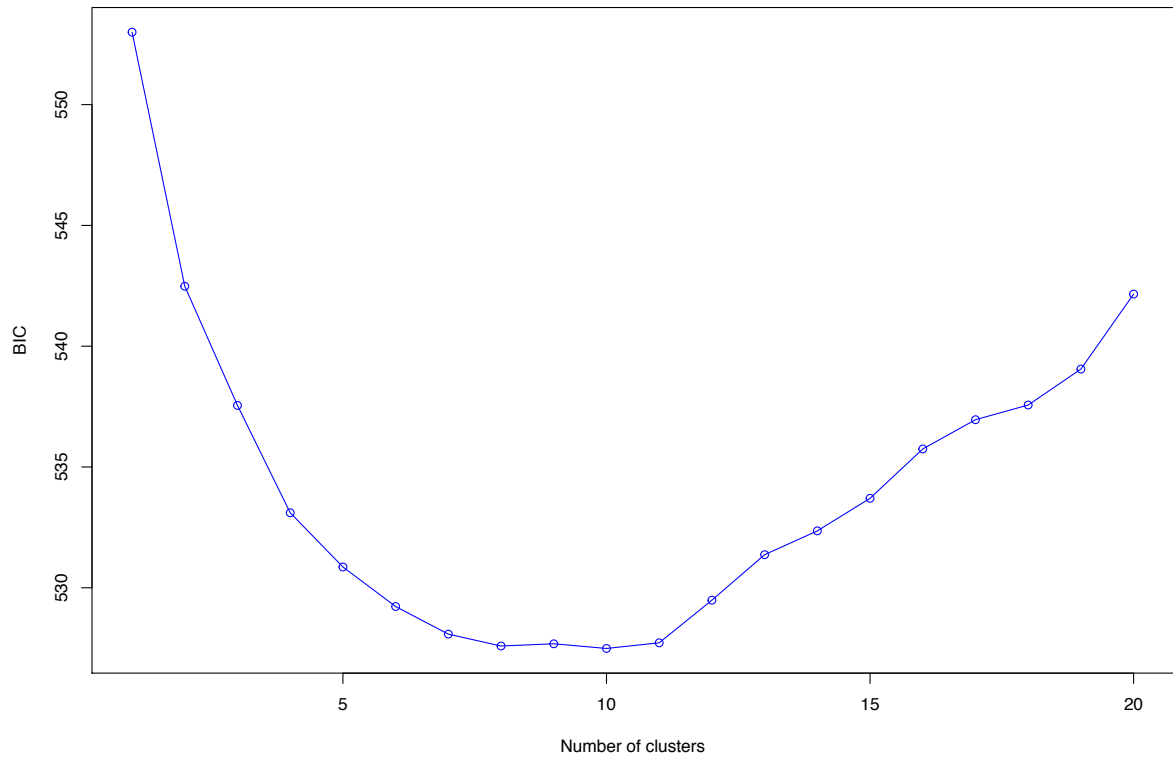

**Fig. S4:** Bayesian Information Criterion (BIC) values for each number of clusters, up to 20, calculated by DAPC.

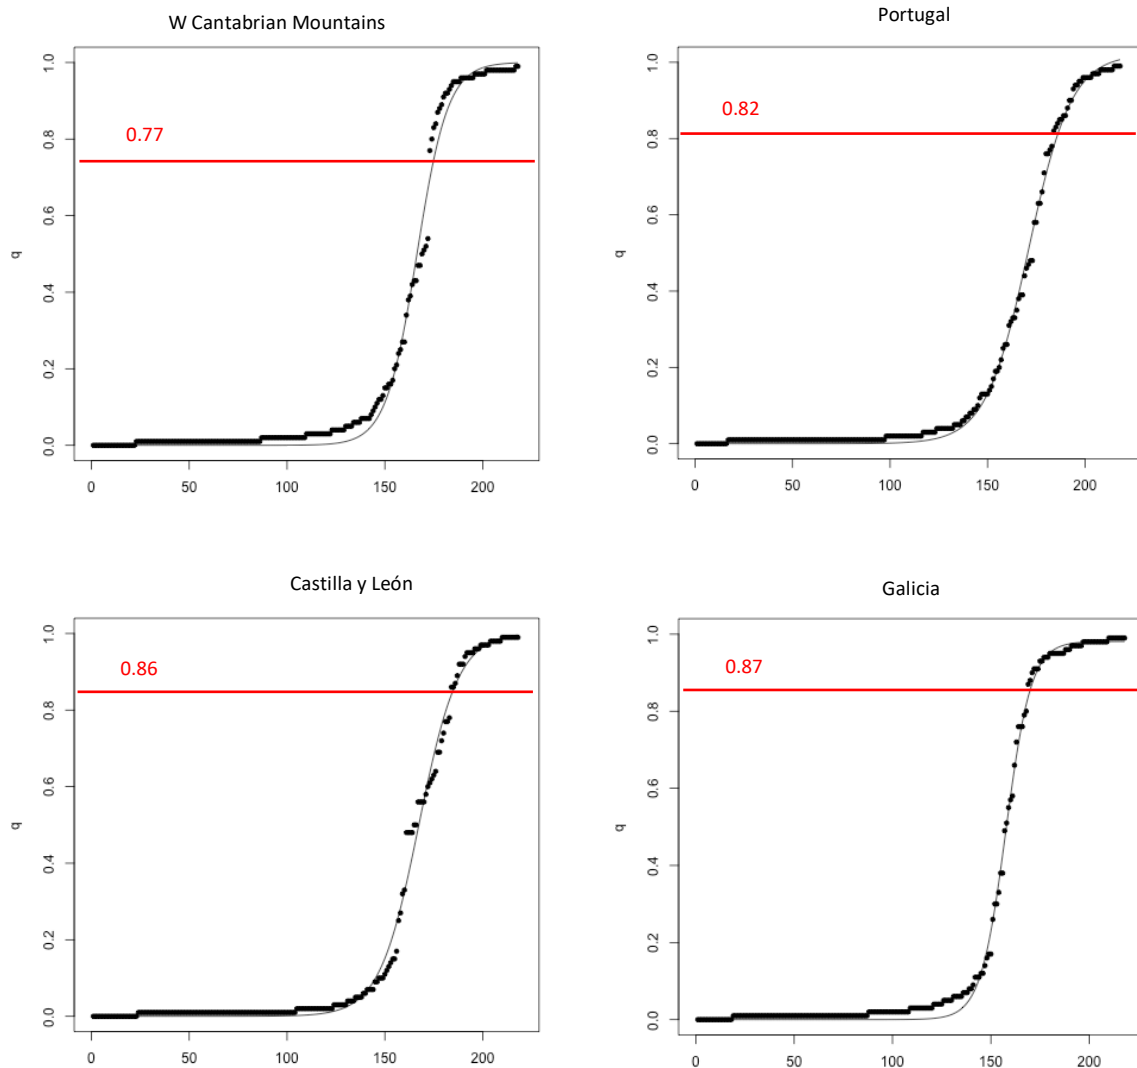

**Fig. S5: Distribution of membership proportions and cut-off values for each cluster at K=4.** Individuals above the cut-off value (red line) were considered as belonging to that cluster ('non-admixed').

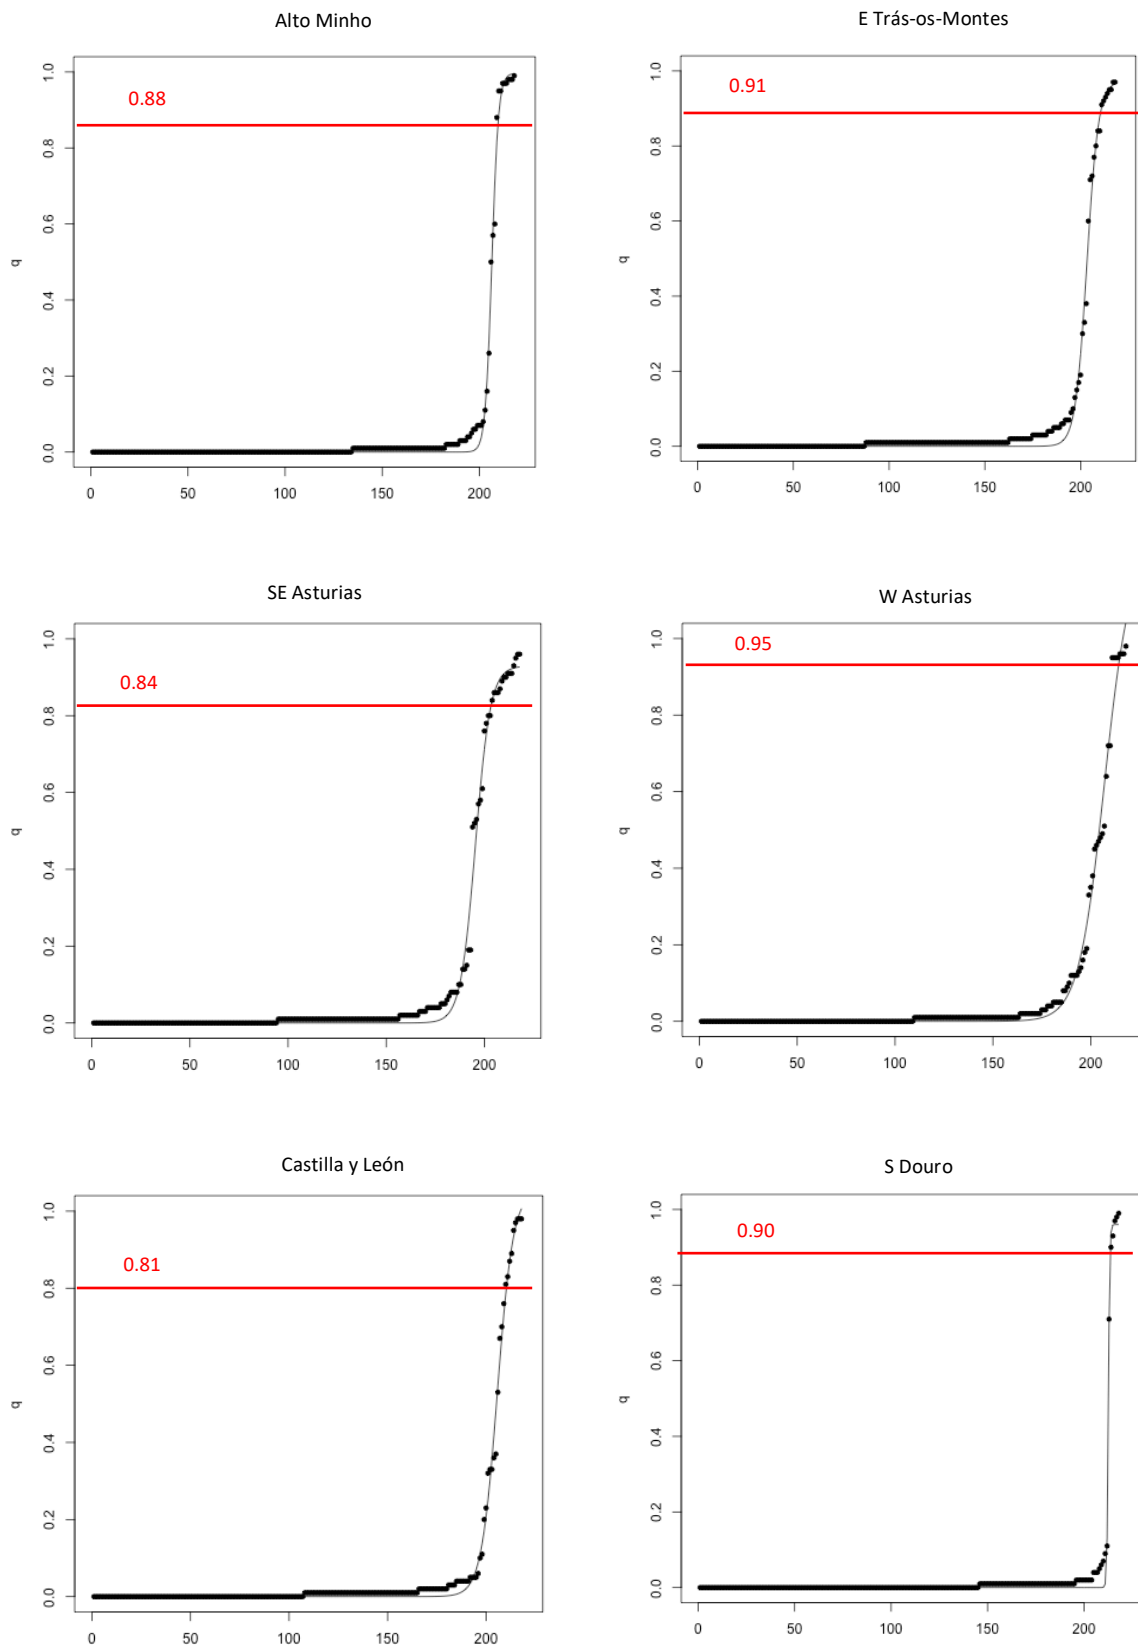

**Fig. S6: Distribution of membership proportions and cut-off values for each cluster at K=11. Individuals above the cut-off value (red line) were considered as belonging to that cluster ('non-admixed').**

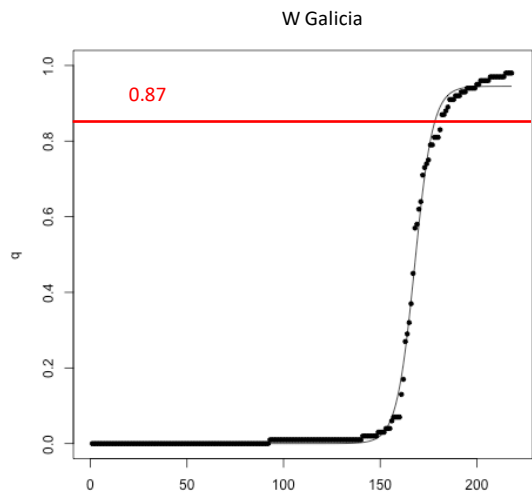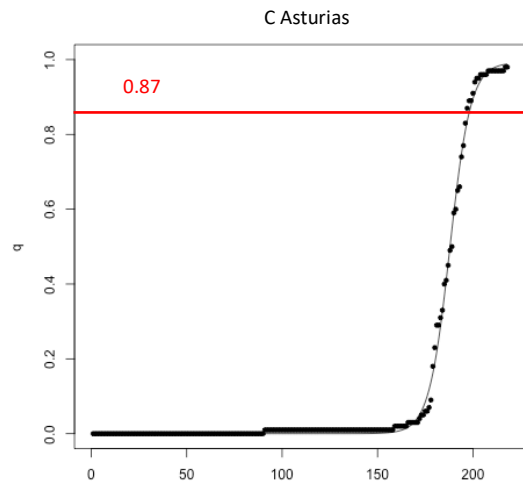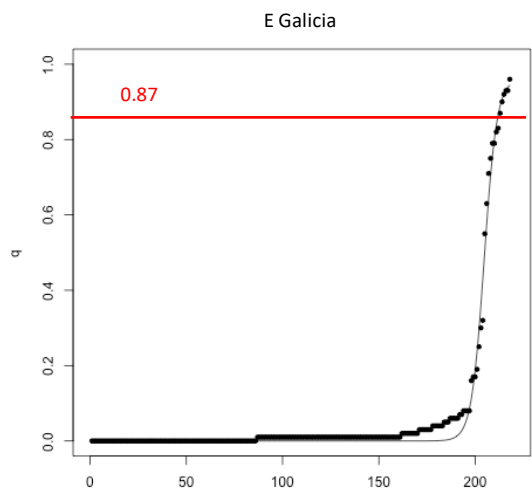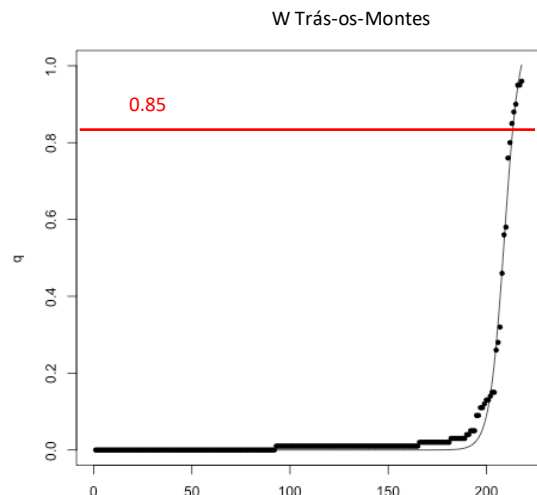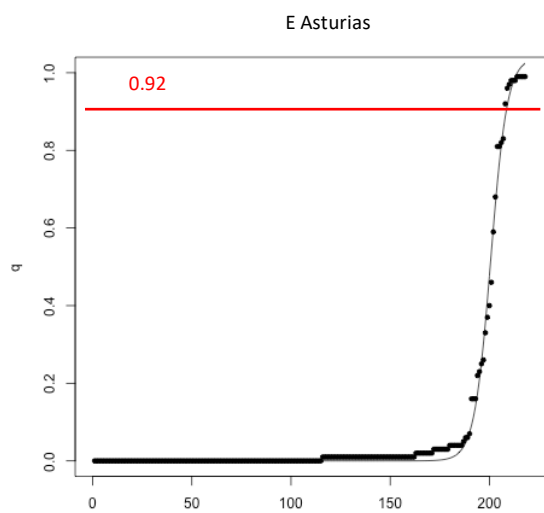

Fig. S6 (continued)

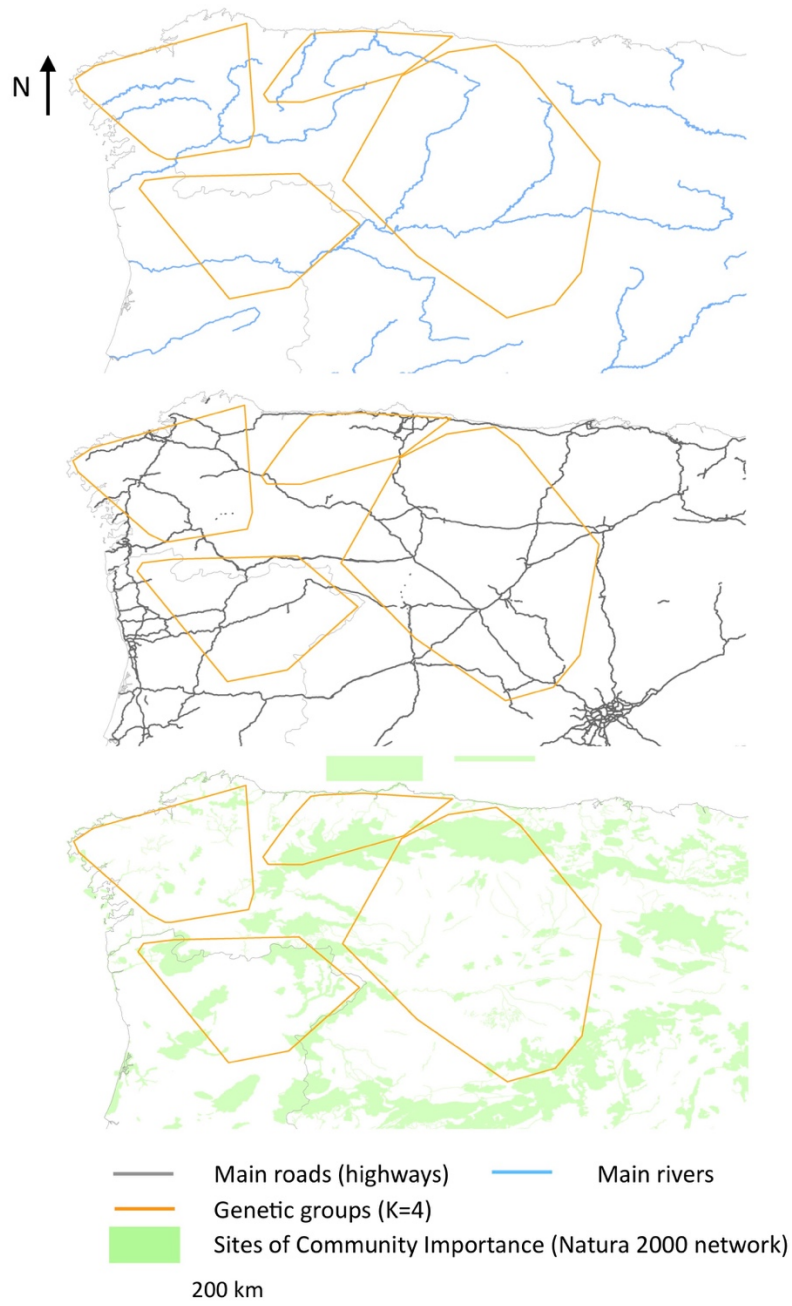

**Fig. S7: Spatial overlap between the genetic groups identified at K=4 (orange polygons) and main rivers, main roads (highways), and the Sites of Community Interest (Natura 2000 Network).** Estimated wolf packs in the Iberian Peninsula in 2005 (Álvares et al. 2005) are denoted with black dots and the locations of the genetic samples used in this study are shown in orange. Spatial information was extracted from Ministerio de Agricultura, Pesca y Alimentación and Centro Nacional de Información Geográfica (Spain), and Instituto Geográfico do Exército, Agência Portuguesa do Ambiente and Instituto da Conservação da Natureza e das Florestas (Portugal).

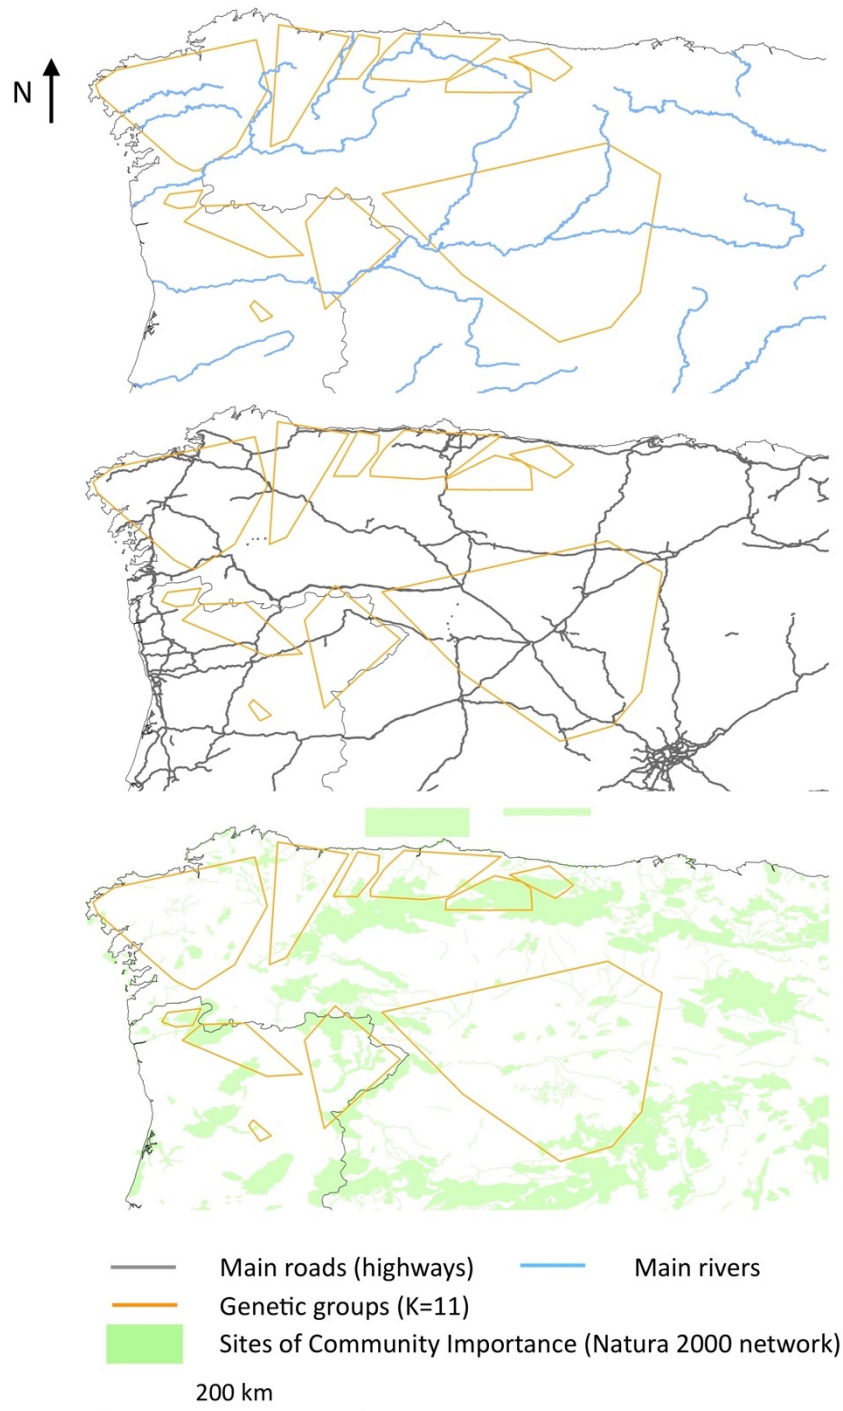

**Fig. S8: Spatial overlap between the genetic groups identified at K=11 (orange polygons) and main rivers, main roads (highways), and the Sites of Community Interest (Natura 2000 Network).** Estimated wolf packs in the Iberian Peninsula in 2005 (Álvares et al. 2005) are denoted with black dots and the locations of the genetic samples used in this study are shown in orange. Spatial information was extracted from Ministerio de Agricultura, Pesca y Alimentación and Centro Nacional de Información Geográfica (Spain), and Instituto Geográfico do Exército, Agência Portuguesa do Ambiente and Instituto da Conservação da Natureza e das Florestas (Portugal).

**Table S1:** Microsatellite loci used in this study with corresponding repeat motif, allele size range and reference.

| <b>Locus name</b>    | <b>Repeat type</b> | <b>Allele Range</b> | <b>Reference</b>                                       |
|----------------------|--------------------|---------------------|--------------------------------------------------------|
| AHT103               | Di                 | 71-89               | Holmes et al., 1995                                    |
| AHT111               | Di                 | 72-92               | Holmes et al., 1993                                    |
| AHT121               | Di                 | 74-118              | Holmes et al., 1995                                    |
| AHT132               | Di                 | 170-182             | by N. Holmes                                           |
| AHT137               | Di                 | 128-160             | Holmes et al., 1995                                    |
| AHT <sub>h</sub> 171 | Di                 | 216-240             | Breen et al., 2001                                     |
| AHT <sub>h</sub> 260 | Compound           | 229-265             | Breen et al., 2001                                     |
| AHT <sub>k</sub> 211 | Di                 | 82-98               | Lingaas et al., 1997                                   |
| AHT <sub>k</sub> 253 | Di                 | 280-300             | Lingaas et al., 1997                                   |
| C04.140              | Di                 | 132-160             | Ostrander, Sprague Jr., & Rine, 1993                   |
| C08.410              | Di                 | 95-125              | Ostrander, Mapa, Yee, & Rine, 1995                     |
| C08.618              | Di                 | 188-208             | Ostrander et al., 1995                                 |
| C09.173              | Di                 | 100-118             | Ostrander et al., 1993                                 |
| C09.474              | Di                 | 111-133             | Ostrander et al., 1995                                 |
| C13.758              | Di                 | 220-244             | Mellersh et al., 1997                                  |
| C14.866              | Di                 | 221-257             | Mellersh et al., 1997                                  |
| C20.253              | Di                 | 95-125              | Ostrander et al., 1993                                 |
| C20.446              | Di                 | 173-201             | Ostrander et al., 1995                                 |
| C22.279              | Di                 | 108-132             | Ostrander et al., 1993                                 |
| C27.442              | Di                 | 158-172             | Ostrander et al., 1995                                 |
| CPH02                | Di                 | 87-113              | Fredholm & Winterø, 1995                               |
| CPH05                | Di                 | 95-131              | Fredholm & Winterø, 1995                               |
| CPH09                | Di                 | 133-163             | Fredholm & Winterø, 1995                               |
| CPH14                | Di                 | 185-205             | Fredholm & Winterø, 1995                               |
| CXX.459              | Di                 | 141-167             | Ostrander et al., 1995                                 |
| Dbar2                | Di                 | 163-169             | Kerns et al., 2004                                     |
| FH2001               | Tetra              | 123-155             | Francisco, Langston, Mellersh, Neal, & Ostrander, 1996 |
| FH2010               | Tetra              | 216-240             | Francisco et al., 1996                                 |
| FH2054               | Tetra              | 121-181             | Francisco et al., 1996                                 |
| FH2079               | Tetra              | 246-292             | Francisco et al., 1996                                 |
| FH2161               | Tetra              | 228-260             | Francisco et al., 1996                                 |
| FH2848               | Di                 | 224-244             | Breen et al., 2001                                     |
| INRA21               | Di                 | 87-103              | Mariat, Kessler, Vaiman, & Panthier, 1996              |
| INU005               | Di                 | 104-136             | Finnzymes, Inc                                         |
| INU030               | Di                 | 136-156             | Finnzymes, Inc                                         |
| INU055               | Di                 | 196-210             | Finnzymes, Inc                                         |
| PEZ1                 | Tetra              | 99-131              | Neff et al., 1999                                      |
| PEZ3                 | Tri                | 106-147             | Neff et al., 1999                                      |
| PEZ5                 | Tetra              | 95-119              | Neff et al., 1999                                      |
| REN162C04            | Di                 | 189-215             | Guyon et al., 2003                                     |
| REN169D01            | Di                 | 192-220             | Guyon et al., 2003                                     |
| REN169O18            | Di                 | 145-171             | Guyon et al., 2003                                     |
| REN247M23            | Di                 | 263-283             | Guyon et al., 2003                                     |



|          |      |         |                                          |
|----------|------|---------|------------------------------------------|
| REN54P11 | Di   | 223-245 | Guyon et al., 2003                       |
| REN64E19 | Di   | 132-181 | Breen et al., 2001                       |
| VWF      | Hexa | 138-192 | Shibuya, Collins, Huang, & Johnson, 1993 |

## References

- Breen, M., Jouquand, S., Renier, C., Mellersh, C. S., Hitte, C., Holmes, N. G., ... Galibert, F. 2001. Chromosome-specific single-locus FISH probes allow anchorage of an 1800-marker integrated radiation-hybrid/linkage map of the domestic dog genome to all chromosomes. *Genome Research*, 1110, 1784–1795. doi:10.1101/gr.189401
- Francisco, L. V, Langsten, A. A., Mellersh, C. S., Neal, C. L., & Ostrander, E. a. 1996. A class of highly polymorphic tetranucleotide repeats for canine genetic mapping. *Mammalian Genome*, 75, 359–362. doi:10.1007/s003359900104
- Fredholm, M., & Winterø, a K. 1995. Variation of short tandem repeats within and between species belonging to the Canidae family. *Mammalian Genome*, 61, 11–8. doi:10.1007/BF00350887
- Godinho, R., Llaneza, L., Blanco, J. C., Lopes, S., Álvares, F., García, E. J., ... Ferrand, N. 2011. Genetic evidence for multiple events of hybridization between wolves and domestic dogs in the Iberian Peninsula. *Molecular Ecology*, 2024, 5154–5166. doi:10.1111/j.1365-294X.2011.05345.x
- Godinho, R., López-Bao, J. V., Castro, D., Llaneza, L., Lopes, S., Silva, P., & Ferrand, N. 2015. Real-time assessment of hybridization between wolves and dogs: Combining noninvasive samples with ancestry informative markers. *Molecular Ecology Resources*, 152, 317–328. doi:10.1111/1755-0998.12313
- Guyon, R., Lorentzen, T. D., Hitte, C., Kim, L., Cadieu, E., Parker, H. G., ... Ostrander, E. a. 2003. A 1-Mb resolution radiation hybrid map of the canine genome. *Proceedings of the National Academy of Sciences*, 1009, 5296–5301. doi:10.1073/pnas.0831002100
- Holmes, N. G., Dickens, H. F., Parker, H. L., Binns, M. M., Mellersh, C. S., & Sampson, J. 1995. Eighteen canine microsatellites. *Animal Genetics*, 262, 132a–133. doi:10.1111/j.1365-2052.1995.tb02659.x
- Holmes, N. G., Humphreys, S. J., Binns, M. M., Holliman, A., Curtis, R., Mellersh, C. S., & Sampson, I. 1993. Isolation and characterization of microsatellites from the canine genome. *Animal Genetics*, 244, 289–292. doi:10.1111/j.1365-2052.1993.tb00313.x
- Kerns, J. A., Newton, J., Berryere, T. G., Rubin, E. M., Cheng, J. F., Schmutz, S. M., & Barsh, G. S. 2004. Characterization of the dog Agouti gene and a nonagouti mutation in German Shepherd Dogs. *Mammalian Genome*, 1510, 798–808. doi:10.1007/s00335-004-2377-1
- Lingaas, F., Sørensen, A., Juneja, R. K., Johansson, S., Fredholm, M., Winterø, A. K., ... Dolf, G. 1997. Towards construction of a canine linkage map: Establishment of 16 linkage groups. *Mammalian Genome*, 83, 218–221. doi:10.1007/s003359900393
- Lynch, M., & Ritland, K. 1999. Estimation of pairwise relatedness with molecular markers. *Genetics*, 1524, 1753–1766.
- Mariat, D., Kessler, J. L., Vaiman, D., & Panthier, J. J. 1996. Polymorphism characterization of five canine microsatellites. *Animal Genetics*, 276, 434–435. doi:10.1111/j.1365-2052.1996.tb00514.x
- Mellersh, C. S., Mellersh, C. S., Langston, a a, Langston, a a, Acland, G. M.,

- Acland, G. M., ... Ostrander, E. a. 1997. A linkage map of the canine genome. *Genomics*, 463, 326–336. doi:10.1006/geno.1997.5098
- Neff, M. W., Broman, K. W., Mellersh, C. S., Ray, K., Acland, G. M., Aguirre, G. D., ... Rine, J. 1999. A second-generation genetic linkage map of the domestic dog, *Canis familiaris*. *Genetics*, 1512, 803–820. doi:10.1073/pnas.95.6.3048
- Ostrander, E. A., Mapa, F. a., Yee, M., & Rine, J. 1995. One hundred and one new simple sequence repeat-based markers for the canine genome. *Mammalian Genome*, 63, 192–195. doi:10.1007/BF00293011
- Ostrander, E. A., Sprague Jr., G. F., & Rine, J. 1993. Identification and characterization of dinucleotide repeat CAn markers for genetic mapping in dog. *Genomics*, 16, 207–213.
- Shibuya, H., Collins, B. K., Huang, T. H.-M., & Johnson, G. S. 1994. A polymorphic AGGAAT, tandem repeat in an intron of the canine von Willebrand factor gene. *Animal Genetics*, 252, 122–122. doi:10.1111/j.1365-2052.1994.tb00094.x

**Table S2:** PCR conditions for microsatellite loci used in this study.

| Locus                                                                                               | Dye                                                                | Multiplex | Conditions                             |            |
|-----------------------------------------------------------------------------------------------------|--------------------------------------------------------------------|-----------|----------------------------------------|------------|
|                                                                                                     |                                                                    |           | Temperature                            | N Cycles   |
| FH2010<br>FH2079<br>PEZ1<br>PEZ3<br>PEZ5<br>AHT132<br>C27.442                                       | FAM<br>NED<br>FAM<br>NED<br>VIC<br>VIC<br>PET                      | MS1       | 95°C (15')                             | 1          |
|                                                                                                     |                                                                    |           | 95°C (30")                             |            |
|                                                                                                     |                                                                    |           | 56°C (45")<br>72°C (45")               | 40         |
|                                                                                                     |                                                                    |           | 60°C (30')                             | 1          |
| AHT103<br>AHT111<br>C04.140<br>C09.173<br>C13.758<br>C14.866<br>C20.253<br>CPH14<br>FH2001<br>VWF   | NED<br>VIC<br>PET<br>NED<br>FAM<br>VIC<br>PET<br>FAM<br>FAM<br>NED | MS2       | 95°C (15')                             | 1          |
|                                                                                                     |                                                                    |           | 95°C (30")                             |            |
|                                                                                                     |                                                                    |           | 56°C (45")<br>72°C (45")               | 40         |
|                                                                                                     |                                                                    |           | 60°C (30')                             | 1          |
| C08.410<br>C08.618<br>C09.474<br>C20.446<br>CPH02<br>CPH05<br>CPH09<br>CXX459<br>FH2161<br>REN64E19 | VIC<br>VIC<br>PET<br>NED<br>NED<br>FAM<br>NED<br>VIC<br>NED<br>FAM | MS3       | 95°C (15')                             | 1          |
|                                                                                                     |                                                                    |           | 95°C (30")                             |            |
|                                                                                                     |                                                                    |           | 60°C (45")<br>72°C (45")               | 7 (-0.5°C) |
|                                                                                                     |                                                                    |           | 95°C (30")<br>57°C (45")<br>72°C (45") | 33         |
| Dbar2                                                                                               | FAM                                                                | -         | 95°C (15')                             | 1          |
|                                                                                                     |                                                                    |           | 95°C (30")                             |            |
|                                                                                                     |                                                                    |           | 56°C (45")<br>72°C (45")               | 40         |
|                                                                                                     |                                                                    |           | 60°C (15')                             | 1          |

|           |     |                                                                             |            |    |
|-----------|-----|-----------------------------------------------------------------------------|------------|----|
| AHT121    | PET | Thermo<br>Fisher<br>Scientific<br>(Canine<br>Genotypes<br>Panel 2.1<br>Kit) | 98°C (3')  | 1  |
| AHT137    | VIC |                                                                             | 98°C (15") |    |
| AHTh171   | PET |                                                                             | 60°C (75") | 40 |
| AHTh260   | VIC |                                                                             | 72°C (45") |    |
| AHTk253   | VIC |                                                                             | 72°C (5')  | 1  |
| AHTk211   | FAM |                                                                             |            |    |
| C22.279   | FAM |                                                                             |            |    |
| FH2054    | PET |                                                                             |            |    |
| FH2848    | NED |                                                                             |            |    |
| INRA21    | VIC |                                                                             |            |    |
| INU005    | NED |                                                                             |            |    |
| INU030    | NED |                                                                             |            |    |
| INU055    | FAM |                                                                             |            |    |
| REN162C04 | PET |                                                                             |            |    |
| REN169D01 | VIC |                                                                             |            |    |
| REN169O18 | FAM |                                                                             |            |    |
| REN247M23 | PET |                                                                             |            |    |
| REN54P11  | FAM |                                                                             |            |    |

**Table S3:** Summary of the spatial behavior information for 85 wolves collared in the Iberian Peninsula from 1982 to 2015. See references in methods details. Genetic groups are denoted according to Fig. 4 in the main text. “-” = Information not available/Individual not overlapping with any of the genetic groups detected.

| ID | Full monitoring MCP area km <sup>2</sup> | Period    | Sampling period days | Number of locations recorded | Sex | Age yrs | Collar type | Genetic group |
|----|------------------------------------------|-----------|----------------------|------------------------------|-----|---------|-------------|---------------|
| 1  | 67                                       | 1982      | 228                  | -                            | M   | >2      | VHF         | VIII          |
| 2  | 35                                       | 1982-1983 | 276                  | -                            | M   | <2      | VHF         | VIII          |
| 3  | 65                                       | 1991      | 44                   | -                            | F   | >2      | VHF         | VIII          |
| 4  | 91                                       | 1991-1992 | 165                  | -                            | F   | <2      | VHF         | -             |
| 5  | 309                                      | 1996-1997 | 534                  | -                            | M   | >2      | VHF         | VIII          |
| 6  | 288                                      | 1996-1997 | 534                  | -                            | F   | >2      | VHF         | VIII          |
| 7  | 123                                      | 1997      | 169                  | -                            | M   | >2      | VHF         | VIII          |
| 8  | 228                                      | 1997      | 159                  | -                            | M   | <2      | VHF         | VIII          |
| 9  | 155                                      | 1997-1998 | 135                  | 37                           | F   | >2      | VHF         | VII           |
| 10 | 950                                      | 1997-2002 | 2121                 | 242                          | M   | <2      | VHF         | VII           |
| 11 | 530                                      | 1997-2002 | 1734                 | 282                          | F   | >2      | VHF         | VII           |
| 12 | 880                                      | 1997-2003 | 2101                 | 247                          | F   | <2      | VHF         | VII           |
| 13 | 2810                                     | 1997-2003 | 2129                 | 417                          | F   | <2      | VHF         | VII           |
| 14 | 504                                      | 1997-1999 | 487                  | -                            | M   | <2      | VHF         | XI            |
| 15 | 1040                                     | 1998      | 229                  | 47                           | M   | >2      | VHF         | VII           |
| 16 | 132                                      | 1998-1999 | 119                  | -                            | M   | <2      | VHF         | XI            |
| 17 | 169                                      | 1998-1999 | 150                  | -                            | F   | >2      | VHF         | XI            |
| 18 | 695                                      | 1998-1999 | 563                  | 327                          | M   | >2      | VHF         | IX            |
| 19 | 1230                                     | 1998-2001 | 1029                 | 96                           | F   | >2      | VHF         | VII           |
| 20 | 2030                                     | 1998-2002 | 1645                 | 188                          | M   | >2      | VHF         | VII           |
| 21 | 670                                      | 1998-2003 | 2047                 | 183                          | M   | >2      | VHF         | VII           |
| 22 | 56                                       | 1999      | 102                  | 89                           | F   | <2      | VHF         | VII           |
| 23 | 23                                       | 1999      | 58                   | 23                           | M   | <2      | VHF         | VII           |
| 24 | 225                                      | 1999      | 142                  | 55                           | M   | <2      | VHF         | VII           |
| 25 | 270                                      | 1999-2000 | 293                  | 56                           | F   | >2      | VHF         | VII           |
| 26 | 398                                      | 1999-2002 | 784                  | 313                          | M   | <2      | VHF         | IX            |
| 27 | 890                                      | 2000-2003 | 820                  | 135                          | M   | >2      | VHF         | IX            |
| 28 | 640                                      | 2002-2004 | 638                  | 312                          | F   | <2      | VHF         | VII           |
| 29 | 233                                      | 2004      | 89                   | 153                          | M   | >2      | GPS         | VII           |
| 30 | 350                                      | 2004-2005 | 388                  | 42                           | M   | <2      | VHF         | VII           |
| 31 | 80                                       | 2005-2006 | 536                  | 15                           | F   | <2      | VHF         | VII           |
| 32 | 648                                      | 2005-2007 | 632                  | 1853                         | F   | >2      | GPS         | VII           |
| 33 | 238                                      | 2006      | 154                  | 3484                         | M   | >2      | GPS         | I             |
| 34 | 168                                      | 2006      | 52                   | 1133                         | M   | <2      | GPS         | I             |
| 35 | 35                                       | 2006      | 23                   | 247                          | M   | <2      | GPS         | I             |
| 36 | 570                                      | 2006      | 95                   | 971                          | M   | >2      | GPS         | I             |
| 37 | 80                                       | 2007      | 251                  | 2684                         | F   | <2      | GPS         | I             |

|    |      |           |     |       |   |    |     |      |
|----|------|-----------|-----|-------|---|----|-----|------|
| 38 | 80   | 2007      | 95  | 1091  | M | <2 | GPS | I    |
| 39 | 189  | 2007      | 69  | 755   | M | >2 | GPS | I    |
| 40 | 51   | 2007-2008 | 75  | 861   | F | >2 | GPS | X    |
| 41 | 61   | 2008      | 103 | 1011  | M | <2 | GPS | X    |
| 42 | 151  | 2008-2010 | 526 | 5836  | F | >2 | GPS | X    |
| 43 | 391  | 2009      | 111 | 3377  | F | >2 | GPS | I    |
| 44 | 281  | 2009      | 344 | 7146  | M | >2 | GPS | I    |
| 45 | 429  | 2009-2010 | 315 | 10181 | F | >2 | GPS | I    |
| 46 | 831  | 2009-2010 | 241 | 7252  | F | >2 | GPS | I    |
| 47 | 51   | 2009-2010 | 112 | 2595  | M | <2 | GPS | I    |
| 48 | 191  | 2010-2011 | 129 | 4357  | M | <2 | GPS | II   |
| 49 | 205  | 2010-2011 | 206 | 5069  | M | >2 | GPS | VI   |
| 50 | 211  | 2010-2011 | 128 | 2498  | F | <2 | GPS | VI   |
| 51 | 1169 | 2010-2011 | 232 | 1948  | F | >2 | GPS | -    |
| 52 | 850  | 2010-2011 | 399 | -     | M | <2 | GPS | XI   |
| 53 | 98   | 2010-2011 | 368 | 3005  | F | >2 | GPS | X    |
| 54 | 210  | 2010-2011 | 256 | 2083  | M | >2 | GPS | X    |
| 55 | 290  | 2011      | 143 | 3187  | F | <2 | GPS | I    |
| 56 | 235  | 2011      | 138 | 2989  | F | <2 | GPS | I    |
| 57 | 274  | 2011      | 139 | 2889  | F | <2 | GPS | II   |
| 58 | 70   | 2011      | 91  | 2094  | F | >2 | GPS | I    |
| 59 | 165  | 2011      | 121 | 2621  | F | >2 | GPS | I    |
| 60 | 1031 | 2011-2012 | 269 | 6433  | M | >2 | GPS | I    |
| 61 | 115  | 2011-2012 | 488 | 9499  | F | <2 | GPS | I    |
| 62 | 89   | 2011-2012 | 146 | 3486  | F | >2 | GPS | I    |
| 63 | 30   | 2011-2012 | 91  | 2120  | M | <2 | GPS | I    |
| 64 | 530  | 2011-2012 | 163 | 3920  | M | >2 | GPS | I-II |
| 65 | 237  | 2011-2012 | 284 | 4866  | M | <2 | GPS | VI   |
| 66 | 911  | 2012      | 138 | 1214  | M | <2 | GPS | IX   |
| 67 | 291  | 2012      | 58  | 600   | F | >2 | GPS | X    |
| 68 | 89   | 2012-2013 | 259 | 2855  | M | <2 | GPS | I    |
| 69 | 32   | 2012-2013 | 71  | 254   | M | <2 | GPS | I    |
| 70 | 800  | 2012-2013 | 342 | 2977  | F | >2 | GPS | X    |
| 71 | 113  | 2012-2013 | 386 | 4116  | F | >2 | GPS | X    |
| 72 | 1427 | 2012-2014 | 606 | 6394  | M | <2 | GPS | X    |
| 73 | 55   | 2013      | 115 | 682   | F | <2 | GPS | X    |
| 74 | 96   | 2013      | 303 | 1993  | F | >2 | GPS | X    |
| 75 | 1017 | 2013-2014 | 466 | 4051  | F | >2 | GPS | X    |
| 76 | 225  | 2013-2014 | 401 | 4457  | F | >2 | GPS | X    |
| 77 | 312  | 2013-2014 | 162 | 7306  | M | <2 | GPS | I    |
| 78 | 410  | 2013-2014 | 307 | 13493 | M | <2 | GPS | I    |
| 79 | 197  | 2013-2014 | 327 | 13709 | M | <2 | GPS | I    |
| 80 | 314  | 2014      | 285 | 4792  | F | >2 | GPS | I    |
| 81 | 1725 | 2014      | 286 | 7605  | M | <2 | GPS | I-X  |
| 82 | 83   | 2012      | 75  | 962   | M | <2 | GPS | V    |
| 83 | 14   | 2012      | 59  | 948   | F | <2 | GPS | V    |

|    |     |      |    |     |   |    |     |   |
|----|-----|------|----|-----|---|----|-----|---|
| 84 | 48  | 2014 | 16 | 315 | M | >2 | GPS | I |
| 85 | 124 | 2015 | 43 | 542 | M | >2 | GPS | - |

---

**Table S4:** Genetic diversity and relatedness of genetic clusters and geographical genetic groups at K=4. N: sample size; Na: number of alleles; AR: allelic richness rarefied to 46 samples; pAR: private allelic richness rarefied to 46 samples; Ho: observed heterozygosity; He: expected heterozygosity; F: fixation index; r: relatedness (Lynch & Ritland, 1999).

| Genetic group                 |                | N            | Na          | AR          | pAR         | Ho          | He          | F           | r                 |
|-------------------------------|----------------|--------------|-------------|-------------|-------------|-------------|-------------|-------------|-------------------|
| <b>W Cantabrian Mountains</b> | <b>group</b>   | 50.11 ± 0.50 | 4.59 ± 0.23 | 4.44 ± 0.22 | 0.24 ± 0.07 | 0.55 ± 0.03 | 0.59 ± 0.03 | 0.06 ± 0.02 | 0.082 0.072-0.088 |
|                               | <b>cluster</b> | 44.52 ± 0.42 | 4.39 ± 0.24 | 4.09 ± 0.20 | 0.25 ± 0.06 | 0.54 ± 0.03 | 0.59 ± 0.03 | 0.07 ± 0.02 | 0.092 0.084-0.100 |
| <b>N Portugal</b>             | <b>group</b>   | 45.85 ± 0.27 | 5.13 ± 0.25 | 5.00 ± 0.24 | 0.50 ± 0.10 | 0.57 ± 0.02 | 0.62 ± 0.02 | 0.08 ± 0.02 | 0.056 0.050-0.064 |
|                               | <b>cluster</b> | 34.02 ± 0.22 | 4.85 ± 0.22 | 4.64 ± 0.20 | 0.55 ± 0.10 | 0.57 ± 0.02 | 0.61 ± 0.02 | 0.07 ± 0.02 | 0.079 0.069-0.090 |
| <b>Castilla y León</b>        | <b>group</b>   | 52.13 ± 0.61 | 4.74 ± 0.27 | 4.56 ± 0.25 | 0.25 ± 0.07 | 0.53 ± 0.03 | 0.57 ± 0.03 | 0.07 ± 0.02 | 0.096 0.090-0.104 |
|                               | <b>cluster</b> | 33.22 ± 0.40 | 4.11 ± 0.24 | 3.92 ± 0.22 | 0.19 ± 0.05 | 0.52 ± 0.03 | 0.55 ± 0.03 | 0.06 ± 0.03 | 0.164 0.151-0.176 |
| <b>Galicia</b>                | <b>group</b>   | 56.39 ± 0.50 | 4.85 ± 0.26 | 4.55 ± 0.23 | 0.32 ± 0.07 | 0.55 ± 0.03 | 0.57 ± 0.03 | 0.03 ± 0.01 | 0.092 0.086-0.098 |
|                               | <b>cluster</b> | 47.76 ± 0.47 | 4.57 ± 0.26 | 4.08 ± 0.21 | 0.31 ± 0.07 | 0.54 ± 0.03 | 0.55 ± 0.03 | 0.02 ± 0.02 | 0.110 0.103-0.116 |



**Table S5:** Genetic diversity and relatedness of geographical genetic groups and genetic clusters at K=11. N: sample size; Na: number of alleles; Ne: number of effective alleles; AR: allelic richness rarefied to 10 samples for the populations, and to 6 samples for the clusters; pAR: private allelic richness rarefied to 10 samples for the populations, and to 6 samples for the clusters; Ho: observed heterozygosity; He: expected heterozygosity; F: fixation index; r: relatedness (Lynch and Ritland, 1999)

| Genetic group    |         | N            | Na          | AR          | pAR         | Ho          | He          | F             | r<br>Lynch & Ritland 1999 |
|------------------|---------|--------------|-------------|-------------|-------------|-------------|-------------|---------------|---------------------------|
| Alto Minho       | group   | 12.78 ± 0.14 | 3.67 ± 0.16 | 2.93 ± 0.11 | 0.10 ± 0.03 | 0.53 ± 0.03 | 0.52 ± 0.03 | -0.01 ± 0.04  | 0.245 0.214-0.279         |
|                  | cluster | 9.80 ± 0.12  | 2.94 ± 0.13 | 2.31 ± 0.09 | 0.09 ± 0.03 | 0.50 ± 0.04 | 0.47 ± 0.03 | -0.02 ± 0.04  | 0.31 0.28-0.339           |
| W Trás-os-Montes | group   | 10.78 ± 0.07 | 3.78 ± 0.16 | 3.22 ± 0.12 | 0.05 ± 0.02 | 0.57 ± 0.03 | 0.56 ± 0.03 | -0.02 ± 0.03  | 0.074 0.048-0.102         |
|                  | cluster | 5.96 ± 0.03  | 3.02 ± 0.16 | 2.54 ± 0.10 | 0.06 ± 0.03 | 0.61 ± 0.04 | 0.51 ± 0.03 | -0.21 ± 0.04  | 0.204 0.119-0.291         |
| E Asturias       | group   | 17.98 ± 0.25 | 3.46 ± 0.18 | 2.73 ± 0.12 | 0.03 ± 0.02 | 0.51 ± 0.04 | 0.49 ± 0.03 | -0.04 ± 0.03  | 0.254 0.225-0.285         |
|                  | cluster | 10.35 ± 0.18 | 2.44 ± 0.13 | 2.07 ± 0.10 | 0.03 ± 0.02 | 0.46 ± 0.04 | 0.40 ± 0.03 | -0.14 ± 0.04  | 0.445 0.397-0.494         |
| E Trás-os-Montes | group   | 16.39 ± 0.15 | 4.26 ± 0.21 | 3.33 ± 0.13 | 0.11 ± 0.04 | 0.62 ± 0.03 | 0.59 ± 0.03 | -0.05 ± 0.02  | 0.089 0.07-0.11           |
|                  | cluster | 7.65 ± 0.09  | 3.37 ± 0.16 | 2.59 ± 0.11 | 0.08 ± 0.03 | 0.61 ± 0.04 | 0.52 ± 0.03 | -0.17 ± 0.03  | 0.179 0.134-0.23          |
| SE Asturias      | group   | 20.46 ± 0.15 | 4.07 ± 0.22 | 3.10 ± 0.14 | 0.06 ± 0.02 | 0.56 ± 0.03 | 0.55 ± 0.03 | -0.01 ± 0.02  | 0.12 0.104-0.137          |
|                  | cluster | 14.54 ± 0.11 | 3.72 ± 0.20 | 2.59 ± 0.11 | 0.03 ± 0.01 | 0.56 ± 0.04 | 0.53 ± 0.03 | -0.06 ± 0.03  | 0.157 0.131-0.183         |
| W Asturias       | group   | 11.67 ± 0.11 | 3.65 ± 0.17 | 3.00 ± 0.12 | 0.10 ± 0.04 | 0.58 ± 0.03 | 0.56 ± 0.02 | -0.047 ± 0.03 | 0.151 0.116-0.19          |
|                  | cluster | 7.67 ± 0.11  | 3.00 ± 0.16 | 2.43 ± 0.09 | 0.10 ± 0.04 | 0.55 ± 0.04 | 0.51 ± 0.02 | -0.09 ± 0.05  | 0.232 0.191-0.275         |

**Table S5** continued

| Genetic group   |         | N            | Na          | AR          | pAR         | Ho          | He          | F            | r<br>Lynch & Ritland 1999 |
|-----------------|---------|--------------|-------------|-------------|-------------|-------------|-------------|--------------|---------------------------|
| Castilla y León | group   | 12.78 ± 0.27 | 3.70 ± 0.22 | 3.07 ± 0.16 | 0.09 ± 0.03 | 0.51 ± 0.03 | 0.54 ± 0.03 | 0.05 ± 0.03  | 0.148 0.124-0.176         |
|                 | cluster | 8.22 ± 0.17  | 3.20 ± 0.21 | 2.51 ± 0.12 | 0.09 ± 0.02 | 0.51 ± 0.03 | 0.51 ± 0.03 | 0.00 ± 0.04  | 0.214 0.177-0.251         |
| S Douro         | group   | 5.89 ± 0.05  | 2.87 ± 0.14 | 2.76 ± 0.13 | 0.15 ± 0.05 | 0.55 ± 0.04 | 0.48 ± 0.03 | -0.14 ± 0.04 | 0.377 0.303-0.455         |
|                 | cluster | 4.89 ± 0.05  | 2.57 ± 0.10 | 2.31 ± 0.08 | 0.17 ± 0.05 | 0.55 ± 0.04 | 0.46 ± 0.02 | -0.21 ± 0.04 | 0.399 0.316-0.501         |
| W Galicia       | group   | 50.67 ± 0.50 | 4.67 ± 0.26 | 3.04 ± 0.12 | 0.09 ± 0.02 | 0.54 ± 0.03 | 0.56 ± 0.03 | 0.02 ± 0.02  | 0.104 0.098-0.11          |
|                 | cluster | 35.26 ± 0.36 | 4.09 ± 0.23 | 2.51 ± 0.09 | 0.09 ± 0.03 | 0.53 ± 0.03 | 0.54 ± 0.03 | 0.02 ± 0.02  | 0.131 0.121-0.14          |
| C Asturias      | group   | 29.01 ± 0.30 | 3.89 ± 0.20 | 2.95 ± 0.12 | 0.04 ± 0.01 | 0.53 ± 0.03 | 0.56 ± 0.03 | 0.03 ± 0.03  | 0.16 0.147-0.174          |
|                 | cluster | 21.24 ± 0.24 | 3.46 ± 0.18 | 2.46 ± 0.09 | 0.04 ± 0.01 | 0.50 ± 0.03 | 0.53 ± 0.03 | 0.03 ± 0.03  | 0.198 0.177-0.217         |
| E Galicia       | group   | 10.13 ± 0.20 | 3.94 ± 0.21 | 3.31 ± 0.14 | 0.07 ± 0.02 | 0.62 ± 0.04 | 0.59 ± 0.03 | -0.06 ± 0.03 | 0.106 0.073-0.147         |
|                 | cluster | 6.44 ± 0.15  | 3.17 ± 0.16 | 2.61 ± 0.11 | 0.06 ± 0.02 | 0.62 ± 0.4  | 0.53 ± 0.04 | -0.17 ± 0.04 | 0.198 0.128-0.275         |

**Table S6:** Pairwise  $F_{ST}$  matrix between geographical populations below diagonal and genetic clusters above diagonal at  $K=4$ . All values were statistically significant based on 1000 permutations  $p<0.01$

|                               | <b>W Cantabrian Mountains</b> | <b>N Portugal</b> | <b>Castilla y León</b> | <b>Galicia</b> |
|-------------------------------|-------------------------------|-------------------|------------------------|----------------|
| <b>W Cantabrian Mountains</b> | --                            | 0.08              | 0.10                   | 0.10           |
| <b>N Portugal</b>             | 0.07                          | --                | 0.12                   | 0.08           |
| <b>Castilla y León</b>        | 0.07                          | 0.08              | --                     | 0.14           |
| <b>Galicia</b>                | 0.09                          | 0.06              | 0.11                   | --             |

**Table S7:** Pairwise  $F_{ST}$  matrix between geographical populations below diagonal and genetic clusters above diagonal at  $K=11$ . All values were statistically significant based on 1000 permutations  $p<0.05$

|                  | Alto Minho | E Trás-os-Montes | SE Asturias | W Asturias | Castilla Y León | S Douro | W Galicia | C Asturias | E Galicia | W Trás-os-Montes | E Asturias |
|------------------|------------|------------------|-------------|------------|-----------------|---------|-----------|------------|-----------|------------------|------------|
| Alto Minho       | --         | 0.22             | 0.21        | 0.22       | 0.26            | 0.27    | 0.18      | 0.22       | 0.18      | 0.15             | 0.32       |
| E Trás-os-Montes | 0.13       | --               | 0.14        | 0.16       | 0.16            | 0.20    | 0.13      | 0.17       | 0.11      | 0.13             | 0.26       |
| SE Asturias      | 0.17       | 0.08             | --          | 0.16       | 0.12            | 0.21    | 0.13      | 0.12       | 0.15      | 0.14             | 0.15       |
| W Asturias       | 0.16       | 0.07             | 0.10        | --         | 0.20            | 0.26    | 0.17      | 0.17       | 0.11      | 0.18             | 0.27       |
| Castilla y León  | 0.20       | 0.10             | 0.08        | 0.14       | --              | 0.23    | 0.17      | 0.18       | 0.17      | 0.19             | 0.21       |
| S Douro          | 0.22       | 0.14             | 0.18        | 0.19       | 0.19            | --      | 0.22      | 0.21       | 0.21      | 0.22             | 0.33       |
| W Galicia        | 0.14       | 0.08             | 0.11        | 0.12       | 0.13            | 0.19    | --        | 0.15       | 0.09      | 0.12             | 0.23       |
| C Asturias       | 0.17       | 0.10             | 0.09        | 0.08       | 0.14            | 0.19    | 0.12      | --         | 0.13      | 0.14             | 0.20       |
| E Galicia        | 0.11       | 0.07             | 0.11        | 0.06       | 0.13            | 0.16    | 0.07      | 0.11       | --        | 0.14             | 0.25       |
| W Trás-os-Montes | 0.07       | 0.03             | 0.09        | 0.08       | 0.12            | 0.17    | 0.07      | 0.09       | 0.06      | --               | 0.28       |
| E Asturias       | 0.23       | 0.14             | 0.07        | 0.15       | 0.12            | 0.25    | 0.16      | 0.13       | 0.16      | 0.16             | --         |

**Table S8:** Pairwise Jost's D distance matrix between geographical populations below diagonal and genetic clusters above diagonal at K=4

|                 | Asturias | Portugal | Castilla y León | Galicia |
|-----------------|----------|----------|-----------------|---------|
| Asturias        | --       | 0.14     | 0.14            | 0.16    |
| Portugal        | 0.11     | --       | 0.19            | 0.13    |
| Castilla y León | 0.11     | 0.14     | --              | 0.20    |
| Galicia         | 0.14     | 0.10     | 0.16            | --      |

**Table S9:** Pairwise Jost's D distance matrix between geographical populations below diagonal and genetic clusters above diagonal at K=11

|                         | <b>Alto Minho</b> | <b>E Trás-os-Montes</b> | <b>SE Asturias</b> | <b>W Asturias</b> | <b>Castilla León</b> | <b>Y S Douro</b> | <b>W Galicia</b> | <b>C Asturias</b> | <b>E Galicia</b> | <b>W Trás-os-Montes</b> | <b>E Asturias</b> |
|-------------------------|-------------------|-------------------------|--------------------|-------------------|----------------------|------------------|------------------|-------------------|------------------|-------------------------|-------------------|
| <b>Alto Minho</b>       | --                | 0.30                    | 0.29               | 0.30              | 0.38                 | 0.37             | 0.25             | 0.32              | 0.24             | 0.19                    | 0.40              |
| <b>E Trás-os-Montes</b> | 0.19              | --                      | 0.19               | 0.23              | 0.23                 | 0.29             | 0.18             | 0.24              | 0.15             | 0.18                    | 0.33              |
| <b>SE Asturias</b>      | 0.26              | 0.12                    | --                 | 0.23              | 0.16                 | 0.31             | 0.18             | 0.16              | 0.22             | 0.20                    | 0.17              |
| <b>W Asturias</b>       | 0.24              | 0.12                    | 0.15               | --                | 0.31                 | 0.40             | 0.24             | 0.24              | 0.16             | 0.27                    | 0.33              |
| <b>Castilla León</b>    | 0.32              | 0.16                    | 0.11               | 0.23              | --                   | 0.33             | 0.24             | 0.27              | 0.26             | 0.29                    | 0.24              |
| <b>S Douro</b>          | 0.32              | 0.21                    | 0.28               | 0.29              | 0.29                 | --               | 0.33             | 0.31              | 0.30             | 0.32                    | 0.40              |
| <b>W Galicia</b>        | 0.20              | 0.12                    | 0.16               | 0.18              | 0.20                 | 0.29             | --               | 0.21              | 0.13             | 0.17                    | 0.30              |
| <b>C Asturias</b>       | 0.26              | 0.16                    | 0.13               | 0.12              | 0.21                 | 0.28             | 0.18             | --                | 0.19             | 0.20                    | 0.24              |
| <b>E Galicia</b>        | 0.17              | 0.11                    | 0.18               | 0.10              | 0.22                 | 0.26             | 0.10             | 0.17              | --               | 0.21                    | 0.32              |
| <b>W Trás-os-Montes</b> | 0.10              | 0.05                    | 0.14               | 0.13              | 0.19                 | 0.25             | 0.10             | 0.14              | 0.10             | --                      | 0.34              |
| <b>E Asturias</b>       | 0.31              | 0.20                    | 0.08               | 0.20              | 0.16                 | 0.34             | 0.23             | 0.17              | 0.22             | 0.22                    | --                |
